RESEARCH ARTICLE

# mTORC1 in Thymic Epithelial Cells Is Critical for Thymopoiesis, T-Cell Generation, and Temporal Control of $\gamma\delta$ T17 Development and TCR $\gamma/\delta$ Recombination

Hong-Xia Wang<sup>1,2</sup>, Jinwook Shin<sup>1</sup>, Shang Wang<sup>1,3</sup>, Balachandra Gorentla<sup>1</sup>, Xingguang Lin<sup>1,3</sup>, Jimin Gao<sup>3</sup>, Yu-Rong Qiu<sup>2\*</sup>, Xiao-Ping Zhong<sup>1,4,5\*</sup>

**1** Department of Pediatrics, Division of Allergy and Immunology, Duke University Medical Center, Durham, North Carolina, United States of America, **2** Laboratory Medicine Center, Nanfang Hospital, Southern Medical University, Guangzhou, Guangdong, China, **3** School of Laboratory Medicine, Wenzhou Medical University, Wenzhou, Zhejiang, China, **4** Department of Immunology, Duke University Medical Center, Durham, North Carolina, United States of America, **5** Hematologic Malignancies and Cellular Therapies Program, Duke Cancer Institute, Duke University Medical Center, Durham, North Carolina, United States of America

\* [xiaoping.zhong@duke.edu](mailto:xiaoping.zhong@duke.edu) (XPZ); [qiuyuronggz@126.com](mailto:qiuyuronggz@126.com) (YQ)

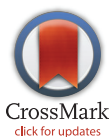

OPEN ACCESS

**Citation:** Wang H-X, Shin J, Wang S, Gorentla B, Lin X, Gao J, et al. (2016) mTORC1 in Thymic Epithelial Cells Is Critical for Thymopoiesis, T-Cell Generation, and Temporal Control of  $\gamma\delta$ T17 Development and TCR $\gamma/\delta$  Recombination. *PLoS Biol* 14(2): e1002370. doi:10.1371/journal.pbio.1002370

**Academic Editor:** Avinash Bhandoola, National Cancer Institute, UNITED STATES

**Received:** August 11, 2015

**Accepted:** December 23, 2015

**Published:** February 18, 2016

**Copyright:** © 2016 Wang et al. This is an open access article distributed under the terms of the [Creative Commons Attribution License](https://creativecommons.org/licenses/by/4.0/), which permits unrestricted use, distribution, and reproduction in any medium, provided the original author and source are credited.

**Data Availability Statement:** All relevant data are within the paper and its Supporting Information files. All FCS files are available in the zenodo website (<http://zenodo.org/record/34843> or DOI URL: <http://dx.doi.org/10.5281/zenodo.34843>).

**Funding:** This study is supported by National Institute of Allergy and Infectious Diseases, National Institutes of Health for XPZ (R01AI079088, [https://projectreporter.nih.gov/project\\_info\\_description.cfm?aid=8816377&icde=27111112&ddparam=&ddvalue=&ddsub=&cr=1&csb=default&cs=ASC](https://projectreporter.nih.gov/project_info_description.cfm?aid=8816377&icde=27111112&ddparam=&ddvalue=&ddsub=&cr=1&csb=default&cs=ASC) and R01AI101206, <https://projectreporter.nih.gov/project>).

## Abstract

Thymus is crucial for generation of a diverse repertoire of T cells essential for adaptive immunity. Although thymic epithelial cells (TECs) are crucial for thymopoiesis and T cell generation, how TEC development and function are controlled is poorly understood. We report here that mTOR complex 1 (mTORC1) in TECs plays critical roles in thymopoiesis and thymus function. Acute deletion of mTORC1 in adult mice caused severe thymic involution. TEC-specific deficiency of mTORC1 (mTORC1KO) impaired TEC maturation and function such as decreased expression of thymotropic chemokines, decreased medullary TEC to cortical TEC ratios, and altered thymic architecture, leading to severe thymic atrophy, reduced recruitment of early thymic progenitors, and impaired development of virtually all T-cell lineages. Strikingly, temporal control of IL-17-producing  $\gamma\delta$ T ( $\gamma\delta$ T17) cell differentiation and TCR $\gamma/\delta$  recombination in fetal thymus is lost in mTORC1KO thymus, leading to elevated  $\gamma\delta$ T17 differentiation and rearranging of fetal specific TCR $\gamma/\delta$  in adulthood. Thus, mTORC1 is central for TEC development/function and establishment of thymic environment for proper T cell development, and modulating mTORC1 activity can be a strategy for preventing thymic involution/atrophy.

## Author Summary

The thymus is the primary organ for T cell generation. Abnormal thymus function profoundly affects host immunity and numerous diseases. Thymopoiesis and thymus function rely on orchestrated interaction between multiple cell types representing different origins. Among them, thymic epithelial cells (TECs) are crucial for thymus development and

[info.description.cfm?aid=8831584&icde=27111112&ddparam=&ddvalue=&ddsub=&cr=2&csb=default&cs=ASC&MMOpt=](https://doi.org/10.1371/journal.pbio.1002370). The funders had no role in study design, data collection and analysis, decision to publish, or preparation of the manuscript.

**Competing Interests:** The authors have declared that no competing interests exist.

**Abbreviations:** BFA, brefeldin A;  $\alpha\beta$ T, conventional TCR $\alpha/\beta$  T; cTEC, cortical thymic epithelial cell; DN, double negative; DP, double positive; ETP, early T cell progenitor; FACS, fluorescence-activated cell sorting; FITC, fluorescein isothiocyanate; H&E, hematoxylin and eosin; HSC, hematopoietic stem cell;  $\alpha$ NKT, invariant Va14-J $\alpha$ 18 TCR-expressing NKT; i. p., intraperitoneally; KO, knockout; MHC, major histocompatibility complex; mTEC, medullary thymic epithelial cell; mTOR, mammalian/mechanistic target of rapamycin; mTORC1, mammalian/mechanistic target of rapamycin complex 1; qRT-PCR, quantitative real-time PCR; RT, room temperature; PMA, phorbol myristate acetate; SEM, standard error of the mean; SP, single positive; TEC, thymic epithelial cell; TRA, tissue-specific antigen; Treg, regulatory T cell; WT, wild-type.

maintenance and T cell generation. How TEC development and function are regulated is poorly understood. The mammalian/mechanistic target of rapamycin (mTOR), a serine/threonine kinase, signals with two complexes, mTORC1 and mTORC2, to control metabolism, growth, proliferation, and survival. Using a mouse model with mTORC1 selectively ablated in TECs, we demonstrate that mTORC1 in TECs plays critical roles in thymopoiesis and thymus function. Absence of mTORC1 results in impaired TEC maturation and function, altered thymic architecture, severe thymic atrophy, and impaired development of virtually all T-cell lineages. Moreover, it also causes increased generation of IL-17-producing  $\gamma\delta$ T ( $\gamma\delta$ T17) cells and fetal-specific  $\gamma\delta$ T subsets in adult thymus, revealing that mTORC1 in TECs is central for temporal control of  $\gamma\delta$ T17 differentiation and *TCRV $\gamma$ / $\delta$*  recombination. Our results establish mTORC1 as a central regulator for TEC development/function and for the establishment of normal thymic environment for proper T cell development. We suggest modulating mTORC1 activity as a strategy for preventing thymic involution/atrophy.

## Introduction

The thymus is the primary organ for T cell development and generation of a diverse repertoire of T cells that are crucial for host defense but are also self-tolerated. Thymic epithelial cells (TECs) are essential for thymopoiesis and establish an environment that properly nurtures T cell development [1]. TECs include cortical and medullary subsets that reside in different localizations in the thymus and perform distinct functions. While cortical thymic epithelial cells (cTECs) are important for positive selection of conventional TCR $\alpha/\beta$  T ( $\alpha\beta$ T) cells, medullary thymic epithelial cells (mTECs) induce negative selection of highly self-reactive T cells and generation of regulatory T cells (Tregs) [2–5]. Interestingly, TECs are dynamically regulated by the cTEC to mTEC ratios being highest in the fetus and progressively lower as the mouse matures. In adult mice, mTECs substantially outnumber cTECs [6]. Although several transcription factors such as Foxn1 and Aire and receptors such as RANK, CD40, and LT $\beta$ R are found important for TEC development/function [7–9], mechanisms that control thymopoiesis and mTEC/cTEC ratios are poorly understood.

During T cell ontogeny, early T cell progenitors (ETPs) enter into the thymus at the cortico-medullary junction. Following initial migration toward the cortex, ETPs, which are Lin<sup>−</sup>CD4<sup>−</sup>CD8<sup>−</sup> double negative (DN) cells that express CD44, cKit, and CD24 but not CD25, undergo maturation sequentially through the DN2, DN3, and DN4 stages [10]. TCR $\gamma\delta$  T ( $\gamma\delta$ T)-cells arise from these DN stages and can further differentiate into effector lineages such as IFN $\gamma$ -producing  $\gamma\delta$ T1 and IL-17-producing  $\gamma\delta$ T17-cells within the thymus [11]. Interestingly,  $\gamma\delta$ T17 differentiation occurs predominantly in the fetal thymus [12, 13]. Additionally, several *TCRV $\gamma$*  (*V $\gamma$ 5* and *V $\gamma$ 6*) and *TCRV $\delta$ 1* segments recombine only in the fetal thymus [14, 15]. Whether and how TECs may nurture a thymic environment to confer such temporal control of  $\gamma\delta$ T17 differentiation and fetal-specific *TCRV $\gamma$ /V $\delta$*  usage has been unclear.

DN thymocytes uncommitted to the  $\gamma\delta$ T fate but with in-frame rearranged *TCR $\beta$*  may overcome the developmental checkpoint between DN3 and DN4 to reach the CD4<sup>+</sup>CD8<sup>+</sup> double positive (DP) stage and adopt the  $\alpha\beta$ T fate. Expression of a functional TCR $\alpha/\beta$  that recognizes self-peptide-major histocompatibility complex (MHC) complexes presented by cTECs triggers positive selection for maturation to the CD4<sup>+</sup>CD8<sup>−</sup> or CD4<sup>−</sup>CD8<sup>+</sup> single positive (SP) stage [16]. After positive selection, SP thymocytes migrate to the thymic medulla in a CCR7-dependent manner [17]. In the medulla, mTECs present promiscuously expressed tissue-specific

antigens (TRAs) to SP thymocytes to trigger negative selection of cells that express TCR with high affinity to TRAs [18]. Small subsets of  $\alpha\beta$ TCR-expressing thymocytes adopt Treg and NKT cell fates. Both negative selection and Tregs are critical for self-tolerance to prevent autoimmune diseases. Abnormal TEC development and function can cause severe consequences such as immunodeficiency or autoimmune diseases in both humans and animals, exemplified by deficiencies in Foxn1 or Aire [7, 19, 20].

The serine/threonine kinase mammalian/mechanistic target of rapamycin (mTOR) has the ability to integrate various environmental and intracellular stimuli and cues to control cell growth, proliferation, survival, autophagy, and metabolism. Mammalian/mechanistic target of rapamycin complex 1 (mTORC1), one of the two complexes, which contains a crucial and unique adaptor molecule Raptor, phosphorylates multiple substrates such as S6K1 and 4E-BP1 to promote protein, nucleic acid, and lipid synthesis, which is crucial for cell growth and proliferation [21]. mTOR is activated in thymocytes following TCR engagement via both PI3K-Akt and RasGRP1-Ras-Erk1/2 pathways [22] and intrinsically controls the development and/or function of *i*NKT cells, Tregs, and  $\alpha\beta$ T cells [23–28]. However, whether mTOR plays a role in TECs to extrinsically control T cell development is unknown. In this report, we demonstrate that mTORC1/Raptor signaling in TECs is crucial for thymopoiesis and proper generation of multiple T cell lineages. Deficiency of mTORC1/Raptor in TECs causes severe thymic atrophy, altered thymic structure, decreased mTEC/cTEC ratios, and severely reduced production of  $\alpha\beta$ T cells, Tregs, *i*NKT cells, and  $\gamma\delta$ T cells correlated with decreased recruitment of ETPs in the thymus. Moreover, fetal thymus restricted  $\gamma\delta$ T17 differentiation and *TCRV $\gamma$ 5/6V $\delta$ 1* recombination occur in adult thymus in the absence of mTORC1 in TECs, suggesting that TECs and thymic environment rather than hematopoietic stem cells confer temporal control of  $\gamma\delta$ T cell development.

## Results

### Acute Deletion of mTORC1/Raptor in Adult Mice Caused Severe Thymic Atrophy

We first examined S6 phosphorylation, an mTORC1/S6K1 dependent event, in TECs from mice aged at 9 d, 3 wk, and 10 wk. S6 phosphorylation was the strongest in TECs from 9-d-old mice but the lowest in cells from 10-wk-old adult mice (Fig 1A). Further comparison between 6-wk- and 6.5-mo-old mice revealed decreased S6 phosphorylation in TECs in aged mice (Fig 1A). Thus, mTORC1 activity in TECs appeared high in young mice but decreased with older age.

To determine the importance of mTORC1/Raptor signaling in thymus homeostasis, we examined 6–8-wk-old *Rptor<sup>fl/fl</sup>-Rosa26-ERCre* (*Rpt<sup>fl/fl</sup>-ERCre* or *eKO*) and control *Rptor<sup>fl/fl</sup>* (*Rpt<sup>fl/fl</sup>* or wild-type; WT) mice following tamoxifen injections on days 1, 2, and 5. On day 8, thymi in *Rpt<sup>fl/fl</sup>-ERCre* mice were much smaller than *Rpt<sup>fl/fl</sup>* mice (Fig 1B), accompanying a substantial decrease in total thymocyte numbers (Fig 1C). The percentage of CD4<sup>+</sup>CD8<sup>+</sup>DP thymocytes was decreased, but the percentages of CD4<sup>+</sup>CD8<sup>-</sup>DN, CD4SP, and CD8SP thymocytes were increased in *Rpt<sup>fl/fl</sup>-ERCre* mice (Fig 1D and 1E). The absolute number of DP thymocytes was severely decreased; CD4SP cell number was decreased by 50%; but DN and CD8SP thymocyte numbers were not obviously affected in tamoxifen-treated *Rpt<sup>fl/fl</sup>-ERCre* mice (Fig 1E). This was correlated with increased death in DP thymocytes (Fig 1F).

Hematoxylin and eosin (H&E) staining of thymus thin sections from tamoxifen-treated *Rpt<sup>fl/fl</sup>-ERCre* mice revealed abnormal thymus architecture: shrinkage of the cortex and increased presence of vacuous/cyst-like structures in medulla (Fig 1G), which were confirmed by immunofluorescence staining of cortex and medulla with anti-Keratin 8 (KRT8) and anti-

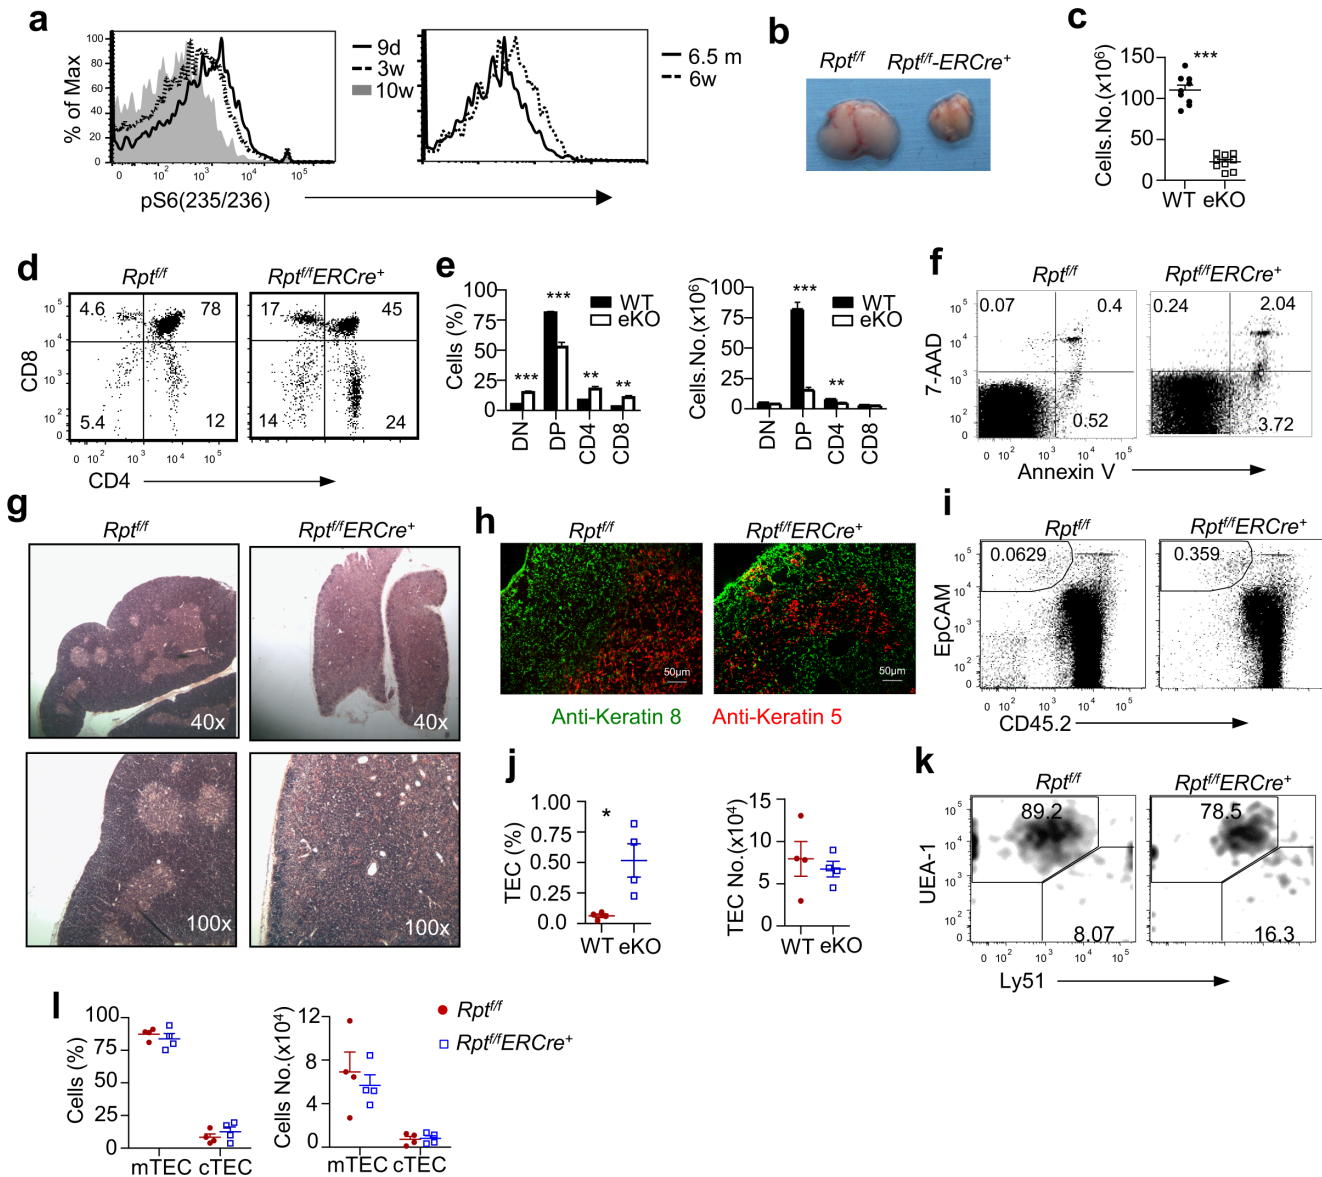

**Fig 1. Acute deletion of mTORC1/Raptor induces thymic atrophy.** **a.** Age-dependent decline of mTORC1 activity in TECs. Overlaid histograms show intracellular S6 phosphorylation in EpCAM<sup>+</sup>CD45<sup>-</sup> TECs from C57BL/6J mice of indicated ages gated as described in [S1A Fig](#). Data shown are representative of three experiments. **b.** Thymus size. For **b** to **l**: Thymic atrophy after acute systemic deletion of mTORC1. Six- to 8-wk-old *Rpt<sup>fl/fl</sup>-ERCre* and *Rpt<sup>fl/fl</sup>* mice were treated with tamoxifen on days 1, 2, and 5 and were euthanized on day 8. **c.** Total thymic cellularity. Bars represent mean  $\pm$  standard error of the mean (SEM) ( $n = 9$ ). Each circle or square represents one wild-type (WT) or knockout (KO) mouse, respectively. Numerical data for this figure and all other figures are in [S1 Data](#). **d.** Thymocyte subsets. Representative dot-plots of CD4 and CD8 staining of thymocytes are shown. The gating strategy is shown in [S1B Fig](#). **e.** Bar graphs represent mean  $\pm$  SEM of percentages (left panel,  $n = 6$ ) and absolute numbers (right panel,  $n = 5$ ) of indicated thymocyte populations. **f.** Annexin-V and 7-AAD staining of DP thymocytes. The gating strategy is shown in [S1C Fig](#). **g.** Hematoxylin and eosin (H&E) staining of thymic thin sections. **h.** Thymic cortex and medulla distribution revealed by immunofluorescence microscopy. Thymus cryosections were stained with primary rabbit anti-KRT5 and rat anti-KRT8 antibodies followed by secondary Rhodamine-labeled donkey anti-rabbit and fluorescein isothiocyanate (FITC)-labeled goat anti-rat antibodies. **i.** Dot-plot of TECs stained with anti-EpCAM and anti-CD45 antibodies. The gating strategy is shown in [S1D Fig](#). **j.** Scatter plots represent mean  $\pm$  SEM ( $n = 4$ ) of EpCAM<sup>+</sup>CD45<sup>-</sup> TEC percentages (left panel) and numbers (right panel). **k.** Distribution of UEA-1<sup>+</sup>Ly51<sup>-</sup> mTECs and UEA-1<sup>-</sup>Ly51<sup>+</sup> cTECs in gated CD45<sup>-</sup>EpCAM<sup>+</sup> cells. The gating strategy is shown in [S1D Fig](#). **l.** Scatter plots represent mean  $\pm$  SEM ( $n = 4$ ) of mTECs and cTECs percentages (left panel) and numbers (right panel). Data shown are representative of or calculated from at least three experiments. \* $p < 0.05$ ; \*\* $p < 0.01$ ; \*\*\* $p < 0.001$  determined by two-tailed Student's *t* test.

doi:10.1371/journal.pbio.1002370.g001

Keratin 5 (KRT5) antibodies, respectively (Fig 1H). The shrinkage of cortex in *Rpt<sup>ff</sup>-ERCre* mice was correlated with a sharp decrease in the number of DP thymocytes, which normally account for most cells in the cortex. In *Rpt<sup>ff</sup>-ERCre* mice, although CD45<sup>-</sup>EpCAM<sup>+</sup> TEC percentages were increased 6-fold (Fig 1I), their total numbers were similar to that of WT controls (Fig 1J). The predominance of UEA-1<sup>+</sup>Ly51<sup>-</sup> mTECs over UEA-1<sup>-</sup>Ly51<sup>+</sup> cTECs was not substantially disturbed in both percentages and numbers (Fig 1K and 1L). Thus, acute systemic mTORC1 deletion rapidly caused severe thymic atrophy, altered thymic architecture, and selectively reduced number of DP thymocytes.

## Crucial Role of mTORC1/Raptor in TECs for Proper Thymopoiesis

Although systemic deletion of mTORC1 caused severe thymic atrophy and decrease of DP thymocytes, T cell-specific ablation of mTORC1 in *Rpt<sup>ff</sup>-LckCre* or *Rpt<sup>ff</sup>-CD4Cre* mice did not cause obvious thymic atrophy or abnormal distribution of DN, DP, and SP populations in the thymus [28]. To test our hypothesis that mTORC1 might play a critical role in TECs for thymopoiesis and function, we generated and analyzed *Rpt<sup>ff</sup>-Foxn1Cre* (knockout; KO) and *Rpt<sup>ff</sup>* (WT) mice. *Foxn1Cre* mice contain an *IRES-Cre* cassette inserted into the 3' untranslated region in the *Foxn1* locus to direct *Cre* expression starting on embryonic day 11.5 in TECs [29]. Strikingly, fetus (embryonic day 20, E20), newborn (1d), young (10 days, 10d; 18 days, 18d; 3 weeks, 3w), and adult (6–8 weeks, 6w) *Rpt<sup>ff</sup>-Foxn1Cre* mice displayed apparent thymic atrophy (Fig 2A), accompanied by severely decreased total thymocyte numbers compared with *Rpt<sup>ff</sup>* controls (Fig 2B). Additionally, normal medullary and cortical structure was lost in *Rpt<sup>ff</sup>-Foxn1Cre* thymus, which had a severely atrophied medulla (Fig 2C and 2D). Thus, mTORC1 in TECs was crucial for normal thymopoiesis.

## mTORC1/Raptor Signaling Ensures TEC Expansion, Maturation, and Proper Lineage Development

Severe thymic atrophy in *Rpt<sup>ff</sup>-Foxn1Cre* mice suggested that mTORC1/Raptor signaling might be required for TEC development and/or function. Although TEC percentages from *Rpt<sup>ff</sup>-Foxn1Cre* mice were not notably altered at indicated ages (Fig 3A and 3B), total TEC numbers were obviously decreased in *Rpt<sup>ff</sup>-Foxn1Cre* thymi (Fig 3C). The magnitude of reduction was smaller at E20 but was progressively exacerbated as mice matured. Both Ly51<sup>-</sup>UEA-1<sup>+</sup> mTEC and Ly51<sup>+</sup>UEA-1<sup>-</sup> cTEC proliferation reflected by BrdU incorporation was decreased (Fig 3D), but their survival was not impaired in *Rpt<sup>ff</sup>-Foxn1Cre* mice (Fig 3E). The impaired TEC proliferation was correlated with decreased S6 phosphorylation and, thus, reduced mTORC1 activity (Fig 3F) and decreased glucose uptake (Fig 3G). Thymic atrophy and reduced TECs in *Rpt<sup>ff</sup>-Foxn1Cre* mice were not caused by expression of Cre protein itself in TECs, as thymi in *Rpt<sup>+/+</sup>-Foxn1Cre* mice and *Rpt<sup>ff</sup>* mice were similar in sizes, total thymic cellularity, thymocyte subsets, and TEC numbers (S3A–S3H Fig). Together, these observations demonstrated that mTORC1 was critical for normal TEC development at least through promoting TEC expansion and glucose uptake.

In WT mice, Ly51<sup>+</sup>UEA-1<sup>-</sup> cTECs were about 2-fold more than Ly51<sup>-</sup>UEA-1<sup>+</sup> mTECs in E20 and newborn thymi but accounted for about or less than 10% of total TECs after 3 wk of age (Fig 4A and 4B). In *Rpt<sup>ff</sup>-Foxn1Cre* mice, cTEC percentages were 2–9-fold higher than WT controls from embryos to adulthood with the biggest difference at 3 wk of age ( $8.76 \pm 1.40\%$  WT versus  $79.36 \pm 4.75\%$  KO), resulting in substantial decreases of mTEC/cTEC ratios after 3 wk of age (Fig 4C). Noticeably, due to severe decreases of total TECs, cTEC numbers were also decreased in *Rpt<sup>ff</sup>-Foxn1Cre* mice throughout their life span except at 3 wk of age (Fig 4D). Expression of Aire, a transcription factor critical for mTEC maturation [20], was

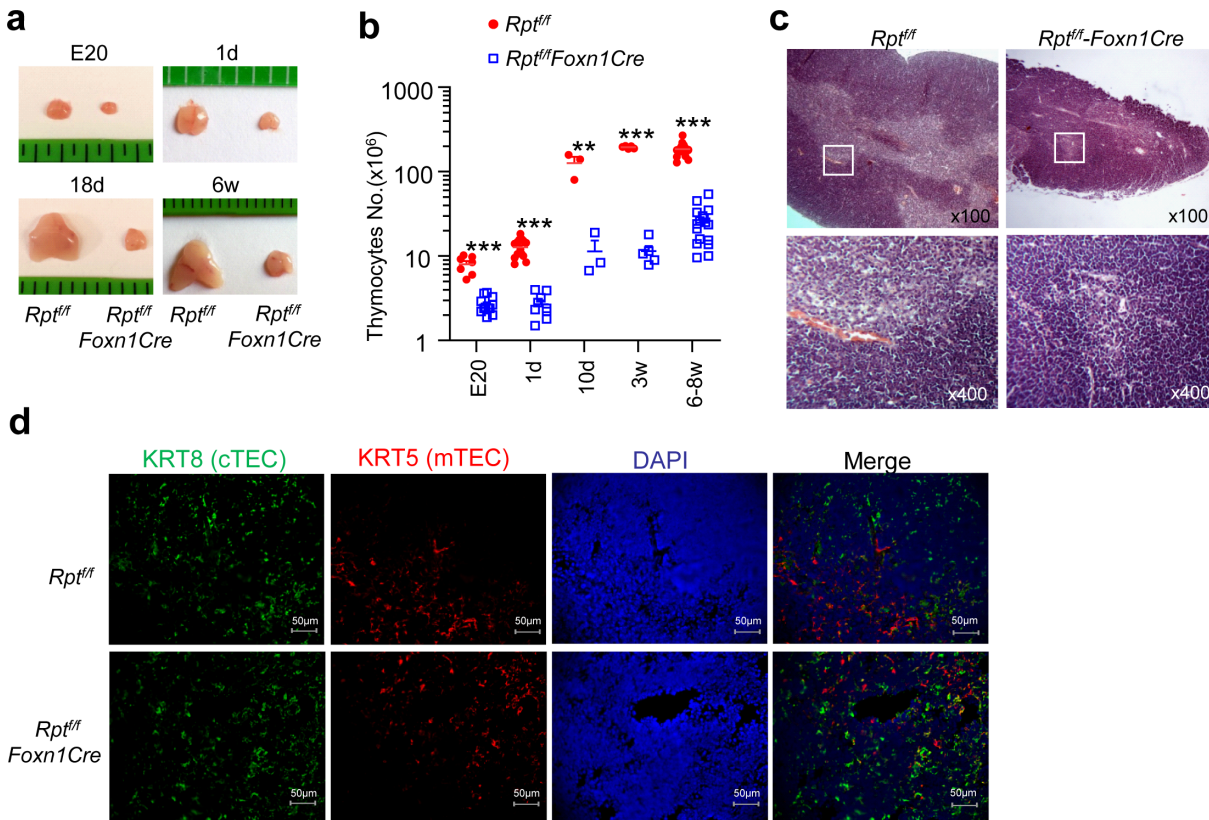

**Fig 2. Thymic atrophy in mice with TEC-specific deletion of mTORC1/Raptor.** *Rpt<sup>fl/fl</sup>-Foxn1Cre* and *Rpt<sup>fl/fl</sup>* mice of indicated ages were generated and examined. **a.** Thymus size. **b.** Total thymic cellularity. Each circle or square represents one WT and KO mouse, respectively. Bars represent mean  $\pm$  SEM. **c.** H&E staining of thymus thin sections from a pair of 3-wk-old *Rpt<sup>fl/fl</sup>-Foxn1Cre* and *Rpt<sup>fl/fl</sup>* mice. **d.** Immunofluorescence analysis of thymus cryosections from a pair of 6-wk-old *Rpt<sup>fl/fl</sup>-Foxn1Cre* and *Rpt<sup>fl/fl</sup>* mice. Cryosections were stained similarly as Fig 1H. Data shown represent at least three experiments. \*\* $p < 0.01$ , \*\*\* $p < 0.001$  determined by two-tailed Student's *t* test.

doi:10.1371/journal.pbio.1002370.g002

not decreased but rather slightly increased in *Rpt<sup>fl/fl</sup>-Foxn1Cre* mTECs (Fig 4E), ruling out decreased Aire expression as a causal factor of impaired TEC maturation/maintenance.

Both cTECs and mTECs can be defined into MHCII<sup>low</sup>CD40<sup>low</sup> immature and MHC-II<sup>hi</sup>CD40<sup>hi</sup> mature stages [30, 31]. From embryos to 3-wk-old mice, fewer *Rpt<sup>fl/fl</sup>-Foxn1Cre* cTECs reached mature stage than WT controls (Fig 4F and 4G). Such phenotype was not observed in adult mice. For mTECs, under-representation of mature stage was only observed in embryos but not after birth. The relatively unimpaired mTEC maturation was correlated with elevated Aire expression. However, due to a severe decrease of total TECs, mature mTECs and cTECs were considerably decreased throughout the life span of *Rpt<sup>fl/fl</sup>-Foxn1Cre* mice (Fig 4H).

Together, these observations demonstrated that mTORC1 is important for TEC expansion and efficient maturation and for establishing mTEC predominance over cTECs after adolescence.

### mTORC1/Raptor Deficiency in TECs Impaired Conventional $\alpha$ BT Cell Generation

We further examined the impact of mTORC1 deficiency in TECs on T cell development. Percentages of DN, DP, CD4SP, and CD8SP thymocytes in *Rpt<sup>fl/fl</sup>-Foxn1Cre* were similar to WT controls at both 10-d and 6-wk of age (Fig 5A and 5B), except that CD4SP thymocyte

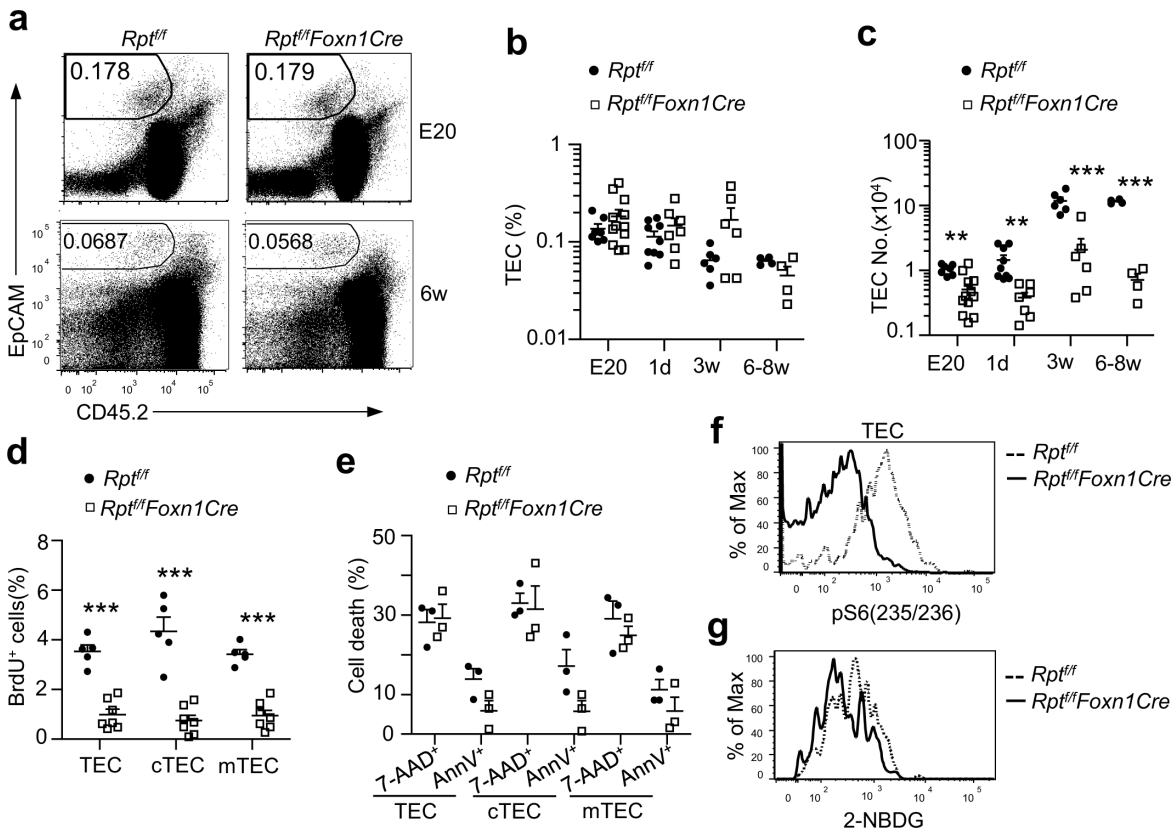

**Fig 3. Severe decreases of TECs and impaired TEC expansion in the absence of mTORC1/Raptor.** TECs from *Rpt<sup>fl/fl</sup>-Foxn1Cre* and *Rpt<sup>fl/fl</sup>* mice of indicated ages were stained with indicated antibodies or reagents and analyzed by flow cytometry. **a.** Representative dot-plots of CD45 and EpCAM expression on thymic cells. The gating strategy is shown in [S2 Fig](#). **b.** Percentages of EpCAM<sup>+</sup>CD45<sup>-</sup> TECs in thymus. **c.** Absolute numbers of TECs. **d.** Reduced TEC proliferation in Raptor-deficient mice. Three-wk-old mice were injected intraperitoneally (i. p.) with BrdU 3 times every 24 h and were euthanized for cell surface and intracellular staining of BrdU 14 h after last injection. **e.** Survival of TECs detected by 7AAD and annexin V staining. **f.** mTORC1 dependent S6 phosphorylation in TECs. Overlaid histograms show S6 phosphorylation in gated WT and *Rpt<sup>fl/fl</sup>-Foxn1Cre* EpCAM<sup>+</sup>CD45<sup>-</sup> TECs. The gating strategy is the same as [S2 Fig](#). **g.** Decreased glucose uptake in Raptor deficient TECs. The gating strategy is the same as [S2 Fig](#). Data shown are representative or calculated from at least three experiments except E20, which was calculated from two experiments. Each circle or square represents one WT or *Rpt<sup>fl/fl</sup>-Foxn1Cre* mouse, respectively. \*, *p* < 0.05; \*\*, *p* < 0.01; \*\*\*, *p* < 0.001 determined by two-tail Student's *t* test.

doi:10.1371/journal.pbio.1002370.g003

percentage was decreased by 50% in *Rpt<sup>fl/fl</sup>-Foxn1Cre* thymus at 10 d. Within CD4SP and CD8SP cells, the ratios of TCRβ<sup>+</sup>CD24<sup>-</sup> mature population were not obviously reduced ([Fig 5C](#)), suggesting that maturation of SP thymocytes was unhindered. Due to the drastic decrease of total thymic cellularity, the absolute numbers of all these populations were severely decreased in *Rpt<sup>fl/fl</sup>-Foxn1Cre* mice ([Fig 5D](#)). BrdU incorporation in DN, DP, and SP thymocytes was similar or only slightly decreased ([Fig 5E](#)), but annexin V<sup>+</sup> apoptotic cells in these populations were increased ([Fig 5F](#)), suggesting that mTORC1 in TECs promotes thymocyte survival. IL-7, a pro-survival cytokine, was not decreased but actually increased at the mRNA level in *Rpt<sup>fl/fl</sup>-Foxn1Cre* TECs ([Fig 5G](#)), implying that mTORC1 may not control thymocyte survival via upregulating IL-7 transcription. However, due to the scarcity of TECs, we could not measure IL-7 protein in TECs and thus could not rule out that mTORC1 may promote thymocyte survival via increasing IL-7 translation. Nevertheless, our data demonstrated that mTORC1/Raptor deficiency in TECs led to increased thymocyte death and impaired αβT cell production without causing a developmental blockade at specific developmental checkpoints.

T cells generated in the thymus populate peripheral lymphoid organs to perform their functions. Both CD4<sup>+</sup> and CD8<sup>+</sup> αβT cell percentages and numbers in the spleen were

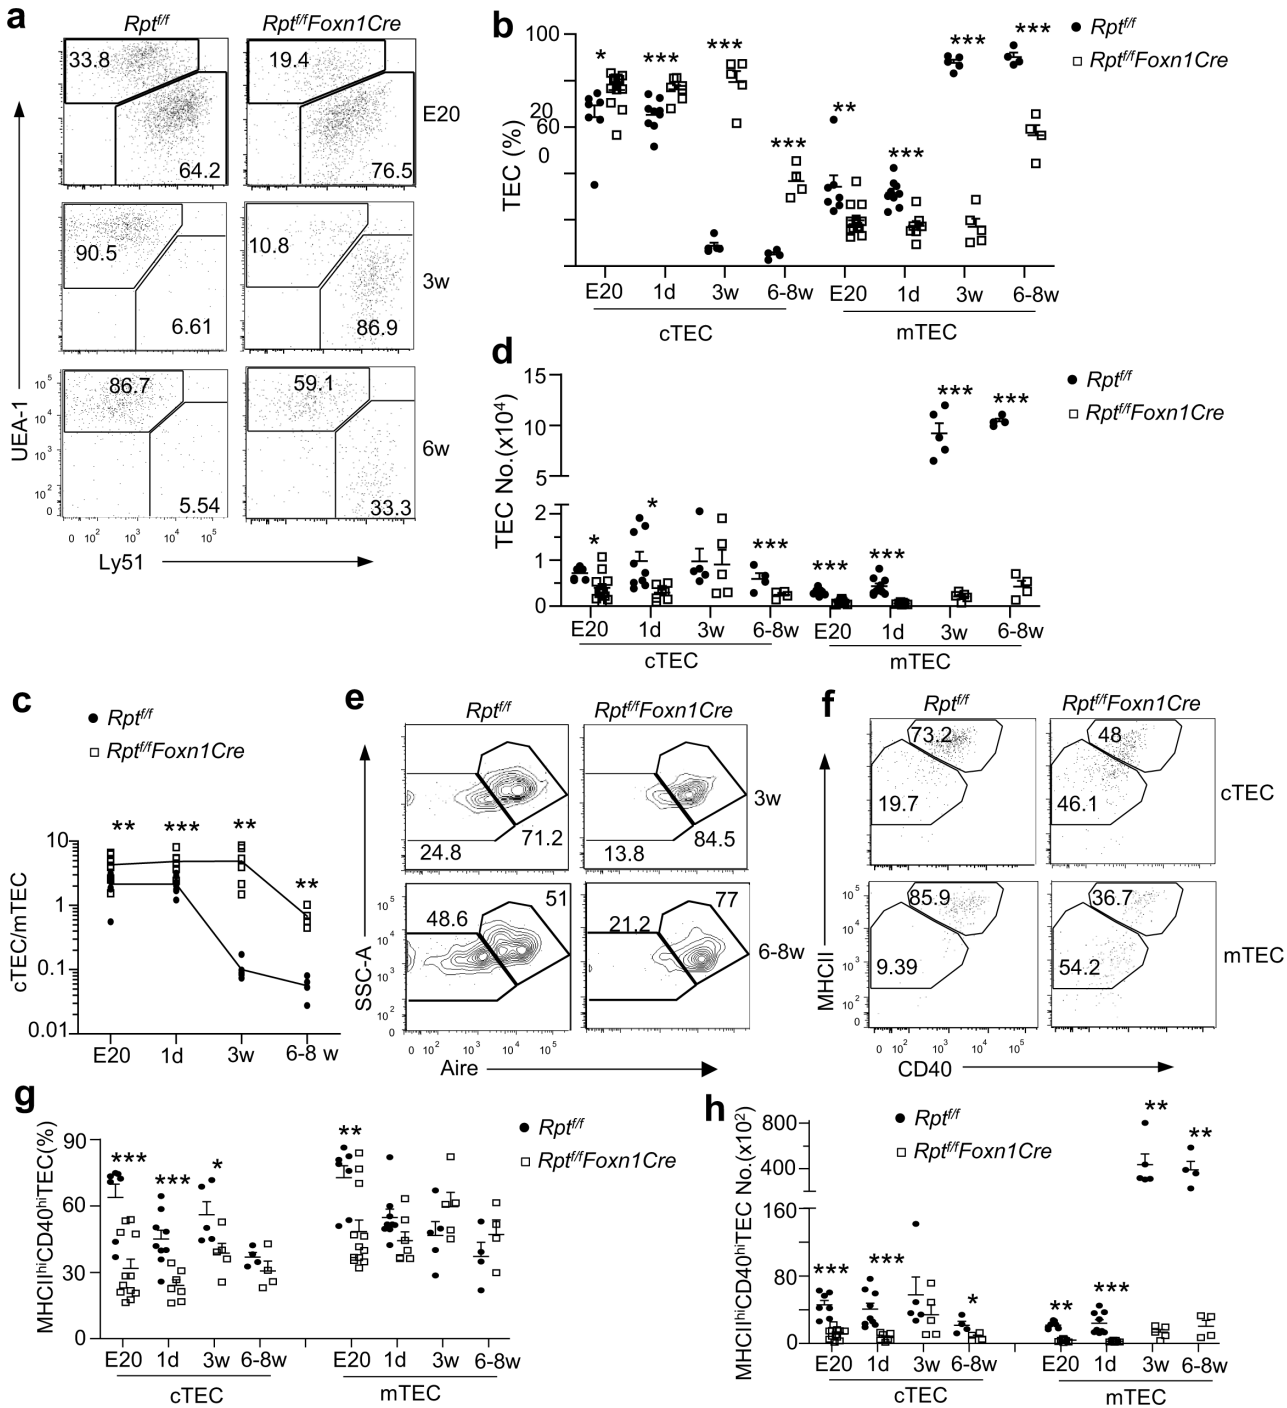

**Fig 4. Decreased mTEC to cTEC ratios in the absence of mTORC1/Raptor.** Thymic single cell suspension from *Rpt<sup>fl/fl</sup>-Foxn1Cre* and *Rpt<sup>fl/fl</sup>* mice of indicated ages were stained with anti-CD45, EpCAM, Ly5.1, UEA-1, MHC II, and CD40 antibodies and analyzed by flow cytometry. **a-d.** Altered m/cTEC ratios in *Rpt<sup>fl/fl</sup>-Foxn1Cre* mice. **a.** Representative plots of UEA-1 and Ly5.1 staining in gated EpCAM<sup>+</sup>CD45<sup>-</sup> TECs. The gating strategy is shown in [S4 Fig. b.](#) Percentages of mTECs and cTECs. Bars indicate mean  $\pm$  SEM. **c.** cTEC to mTEC ratios in fetal thymus and thymus of indicated ages. **d.** Absolute numbers of mTECs and cTECs. **e.** Aire expression in mTECs revealed by intracellular staining. The gating strategy is the same as [S4 Fig. f-h.](#) Impaired TEC maturation in *Rpt<sup>fl/fl</sup>-Foxn1Cre* mice. **f.** Representative dot-plots of MHC class II (MHCII) and CD40 expression on gated mTECs and cTECs from E20 thymus. Gating separates mTECs and cTECs into mature MHCII<sup>hi</sup>CD40<sup>hi</sup> and immature MHCII<sup>low</sup>CD40<sup>low</sup> populations. The gating strategy is the same as [S4 Fig. g.](#) Percentages of MHCII<sup>hi</sup>CD40<sup>hi</sup> mature TECs at the indicated ages. **h.** Cell numbers of MHCII<sup>hi</sup>CD40<sup>hi</sup> mature TECs at the indicated ages. Data shown are representative or calculated from at least four experiments except E20, which was calculated from two experiments. Each circle or square represents one *Rpt<sup>fl/fl</sup>* or *Rpt<sup>fl/fl</sup>-Foxn1Cre* mouse, respectively. \*,  $p < 0.05$ ; \*\*,  $p < 0.01$ ; \*\*\*,  $p < 0.001$  determined by two-tail Student's *t* test.

doi:10.1371/journal.pbio.1002370.g004



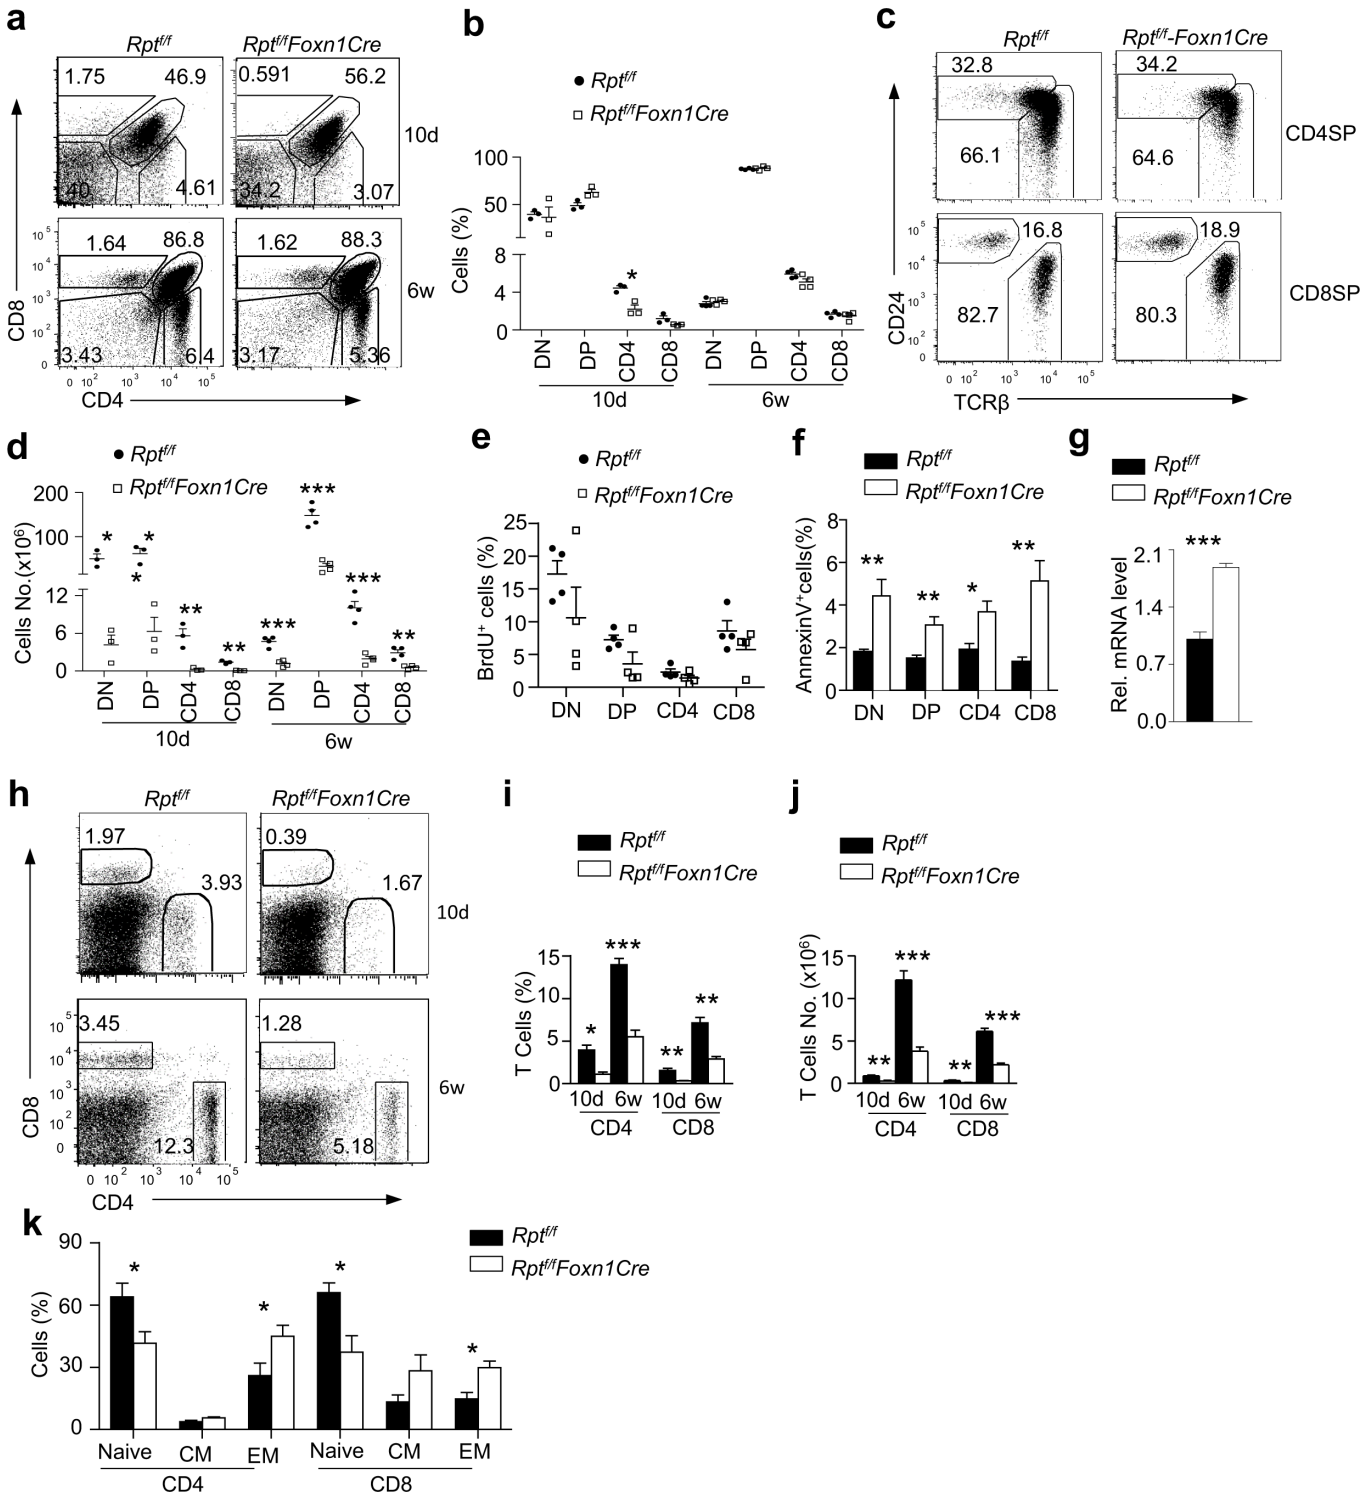

**Fig 5. Impaired  $\alpha\beta$ T cell development in *Rpt<sup>fl/fl</sup>-Foxn1Cre* mice.** **a.** CD4 and CD8 staining of thymocytes in 10-d- and 6-wk-old WT and *Rpt<sup>fl/fl</sup>-Foxn1Cre* mice. The gating strategy is shown in [S5A Fig](#). **b.** Percentages of indicated thymocyte populations. Each circle or square represent one WT and *Rpt<sup>fl/fl</sup>-Foxn1Cre* mice respectively (10d,  $n = 3$ ; 6w,  $n = 4$ ). **c.** CD24 and TCR $\beta$  expression in CD4SP and CD8SP thymocytes from 6-wk old mice. **d.** Cell numbers of indicated thymocyte populations. **e.** BrdU incorporation in thymocytes. Mice were i. p. injected with 1 mg BrdU in 200  $\mu$ l PBS for 4 h before euthanization for thymocyte staining. Scatter plot shows percentages of BrdU<sup>+</sup> cells in indicated populations ( $n = 4$ ). **f.** Increased death of thymocytes from *Rpt<sup>fl/fl</sup>-Foxn1Cre* mice. Bar graphs represent mean  $\pm$  SEM of annexin V<sup>+</sup> cells ( $n = 5$ ). **g.** qPCR assessment of IL-7 mRNA in WT and *Rpt<sup>fl/fl</sup>-Foxn1Cre* TECs. **h.** Representative dot-plots of CD4 and CD8 staining in splenocytes. The gating strategy is shown in [S5B Fig](#). **i.** Bar graphs represent mean  $\pm$  SEM of CD4 and CD8 T cell (10d,

$n = 3$ ; 6w  $n = 4$ ). **j.** Bar graphs represent mean  $\pm$  SEM of CD4 and CD8 T cell numbers (10d,  $n = 3$ ; 6w  $n = 4$ ). **k.** Increased effector/memory-like but decreased naïve T cells in 6–8-wk-old *Rpt<sup>fl/fl</sup>-Foxn1Cre* mice. Bar graphs represent mean  $\pm$  SEM ( $n = 3$ ). Data shown represent or are calculated from at least three experiments. \* $p < 0.05$ , \*\* $p < 0.01$ , \*\*\* $p < 0.001$  determined by two-tailed Student's *t* test.

doi:10.1371/journal.pbio.1002370.g005

considerably decreased in *Rpt<sup>fl/fl</sup>-Foxn1Cre* mice (Fig 5H–5J), without obviously skewing TCRV $\beta$  usage (S6 Fig). There were noticeable increases of CD44<sup>+</sup>CD62L<sup>-</sup> or CD44<sup>+</sup>CD62L<sup>+</sup> effector/memory-like CD4 and CD8 T cells but decreases in CD62L<sup>+</sup>CD44<sup>-</sup> naïve T cells in *Rpt<sup>fl/fl</sup>-Foxn1Cre* mice (Fig 5K), which was likely caused by lymphopenic proliferation. Thus, decreased T cell output from *Rpt<sup>fl/fl</sup>-Foxn1Cre* thymus resulted in T cell lymphopenia.

## Efficient nTreg Development Requires mTORC1/Raptor Signaling in TECs

Recent studies have implicated mTECs for nTreg development [3, 4]. The severe reduction of mTECs in *Rpt<sup>fl/fl</sup>-Foxn1Cre* mice prompted us to examine whether nTreg development was jeopardized. As with CD4<sup>+</sup>Foxp3<sup>-</sup> Teff, CD4<sup>+</sup>Foxp3<sup>+</sup>, nTreg percentages and numbers were substantially decreased in *Rpt<sup>fl/fl</sup>-Foxn1Cre* thymi at both 10 d and 6 wk of age (Fig 6A–6C). Moreover, nTreg percentages within CD4<sup>+</sup>TCR $\beta$ <sup>+</sup> cells and the Treg/Teff ratios were more than 50% lower than those in WT controls (Fig 6D–6F), suggesting a more severely compromised nTreg development than Teff in *Rpt<sup>fl/fl</sup>-Foxn1Cre* mice. One potential mechanism for the severe nTreg developmental defect in *Rpt<sup>fl/fl</sup>-Foxn1Cre* mice could be the increased death of these cells. However, *Rpt<sup>fl/fl</sup>-Foxn1Cre* nTregs were not obviously prone to death when compared with control mice (Fig 6G). Expression of CD27, which promotes nTreg survival and generation [5], was not decreased but slightly increased in nTregs, Foxp3<sup>-</sup>CD4<sup>+</sup>CD8<sup>-</sup> SP, and CD4<sup>-</sup>CD8<sup>+</sup> SP thymocytes from *Rpt<sup>fl/fl</sup>-Foxn1Cre* mice (Fig 6H). Additional studies are needed to determine whether an abnormal CD27 costimulatory signal or other mechanisms contribute to severely compromised nTreg generation in *Rpt<sup>fl/fl</sup>-Foxn1Cre* mice.

In *Rpt<sup>fl/fl</sup>-Foxn1Cre* mice, splenic Treg percentages and numbers were also reduced within total splenocytes (Fig 6I–6K). However, Treg/Teff ratios were about 1.5-fold higher than WT controls (Fig 6L). These Foxp3<sup>+</sup> Treg expressed nTreg marker Helios (Fig 6M), indicating that the relative enrichment of Tregs in the periphery of *Rpt<sup>fl/fl</sup>-Foxn1Cre* mice was likely caused by lymphopenia-induced proliferation because Treg expansion is superior to Teff under such condition. Tregs from *Rpt<sup>fl/fl</sup>-Foxn1Cre* mice expressed higher levels of several Treg signature molecules such as LAG3, CTLA-4, and GITR that facilitate their suppressive activity. Together, these observations indicated that mTORC1 in TECs plays important roles in nTreg differentiation.

## mTORC1/Raptor Signaling in TECs Is Critical for *i*NKT-Cell Development

The invariant V $\alpha$ 14-J $\alpha$ 18 TCR-expressing NKT cells (*i*NKT) cells are also generated in the thymus. Unlike  $\alpha\beta$ T cells, they are positively selected after engagement of the iV $\alpha$ 14TCR with self-lipid ligand-CD1d complex expressed on DP thymocytes [32]. The role of TECs in exogenously controlling *i*NKT cell development is largely unclear. The percentages of PBS57-loaded CD1d-Tetramer (CD1Dtet)<sup>+</sup> TCR $\beta$ <sup>+</sup> *i*NKT cells were decreased in the thymus of 10-d- and 6-wk-old *Rpt<sup>fl/fl</sup>-Foxn1Cre* mice (Fig 7A and 7B), with more drastic decreases of *i*NKT cell total numbers (Fig 7C). Moreover, although the ratio of *i*NKT to  $\alpha\beta$ T was comparable between *Rpt<sup>fl/fl</sup>-Foxn1Cre* and *Rpt<sup>fl/fl</sup>* control mice at 10 d of age, it decreased by 67% in adult *Rpt<sup>fl/fl</sup>-Foxn1Cre* thymus (Fig 7D), suggesting more defective *i*NKT generation than  $\alpha\beta$ T cells in

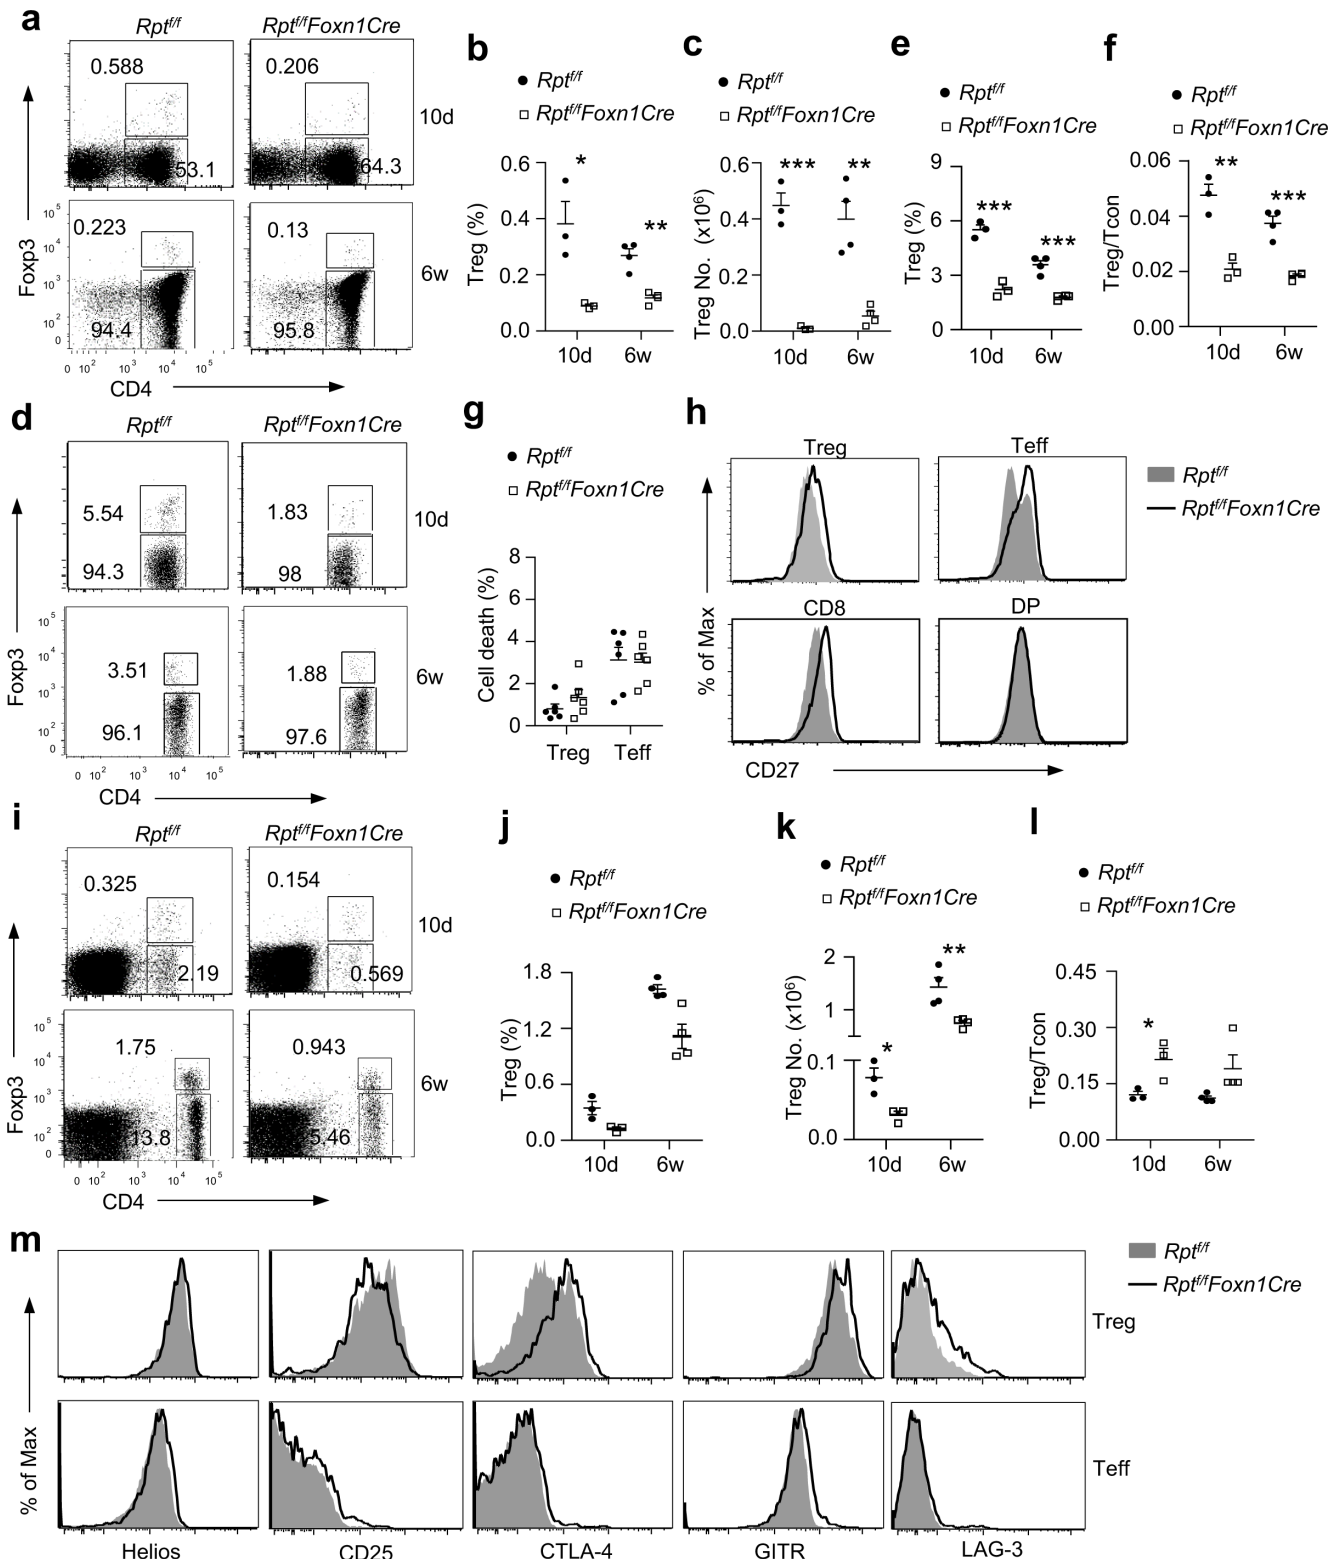

**Fig 6. Impaired nTreg development in *Rpt<sup>fl/fl</sup>-Foxn1Cre* mice.** Thymocytes (a–f) and splenocytes (g–k) from 10 d and 6 wk old *Rpt<sup>fl/fl</sup>* and *Rpt<sup>fl/fl</sup>-Foxn1Cre* mice were subjected to cell surface staining for the indicated molecules and intracellular staining for Foxp3 and Helios. **a.** Representative dot plots of CD4 and Foxp3 expression in live gated thymocytes. The gating strategy is shown in [S7A Fig](#). **b.** Scatter plots show percentages of CD4<sup>+</sup>Foxp3<sup>+</sup> Tregs in the thymus. Each circle or square represents one *Rpt<sup>fl/fl</sup>* or *Rpt<sup>fl/fl</sup>-Foxn1Cre* mouse. **c.** Total CD4<sup>+</sup>Foxp3<sup>+</sup> Treg numbers in the thymus. **d.** Foxp3 staining in gated CD4<sup>+</sup>TCRβ<sup>+</sup> thymocytes. The gating strategy is same as [S7A Fig](#). **e.** Percentages of Foxp3<sup>+</sup> cells within gated CD4<sup>+</sup>TCRβ<sup>+</sup> thymocytes; **f.** Ratio of Foxp3<sup>+</sup> to

Foxp3<sup>-</sup> cells within CD4<sup>+</sup>TCRβ<sup>+</sup> thymocytes. **g.** Percentages of cell death of Foxp3<sup>+</sup> and Foxp3<sup>-</sup> cells within CD4<sup>+</sup>CD8<sup>-</sup>TCRβ<sup>+</sup> thymocytes. **h.** Overlaid histograms show CD27 expression in Foxp3<sup>+</sup>CD4<sup>+</sup>TCRβ<sup>+</sup>, Foxp3<sup>-</sup>CD4<sup>+</sup>TCRβ<sup>+</sup>, CD4<sup>-</sup>CD8<sup>+</sup>TCRβ<sup>+</sup>, and CD4<sup>+</sup>CD8<sup>+</sup> thymocytes. The gating strategy is shown in [S7B Fig](#). **i.** Representative dot plots of CD4 and Foxp3 expression in live gated splenocytes. The gating strategy is shown in [S7C Fig](#). **j.** Scatter plots show percentages of CD4<sup>+</sup>Foxp3<sup>+</sup> Tregs in the spleen. Each circle or square represents one *Rpt<sup>fl/fl</sup>* or *Rpt<sup>fl/fl</sup>-Foxn1Cre* mouse. **k.** Total CD4<sup>+</sup>Foxp3<sup>+</sup> Treg numbers in the spleen. **l.** Ratio of Foxp3<sup>+</sup> to Foxp3<sup>-</sup> cells within CD4<sup>+</sup>TCRβ<sup>+</sup> splenocytes. **m.** Overlaid histograms show expression of indicated Treg signature molecules in Foxp3<sup>+</sup>CD4<sup>+</sup> and Foxp3<sup>-</sup>CD4<sup>+</sup> splenocytes. The gating strategy is the same as [S7C Fig](#). Data shown are representative or calculated from at least three experiments (a–g, i–l) or two experiments (h, m). \*, *p* < 0.05; \*\*, *p* < 0.01; \*\*\*, *p* < 0.001 determined by tailed Student's *t* test.

doi:10.1371/journal.pbio.1002370.g006

adult mice. Although IL-15 expressed by mTECs promotes late stage *i*NKT cell development [33] and the mTEC number was severely decreased in *Rpt<sup>fl/fl</sup>-Foxn1Cre* thymus, no obvious late stage *i*NKT developmental blockade was observed. The relative percentages of stages 1 (CD24<sup>-</sup>CD44<sup>-</sup>NK1.1<sup>-</sup>), 2 (CD24<sup>-</sup>CD44<sup>+</sup>NK1.1<sup>-</sup>), and 3 (CD24<sup>-</sup>CD44<sup>+</sup>NK1.1<sup>+</sup>) *i*NKT cells in these mice were similar to WT controls ([Fig 7E and 7F](#)), although their absolute numbers were

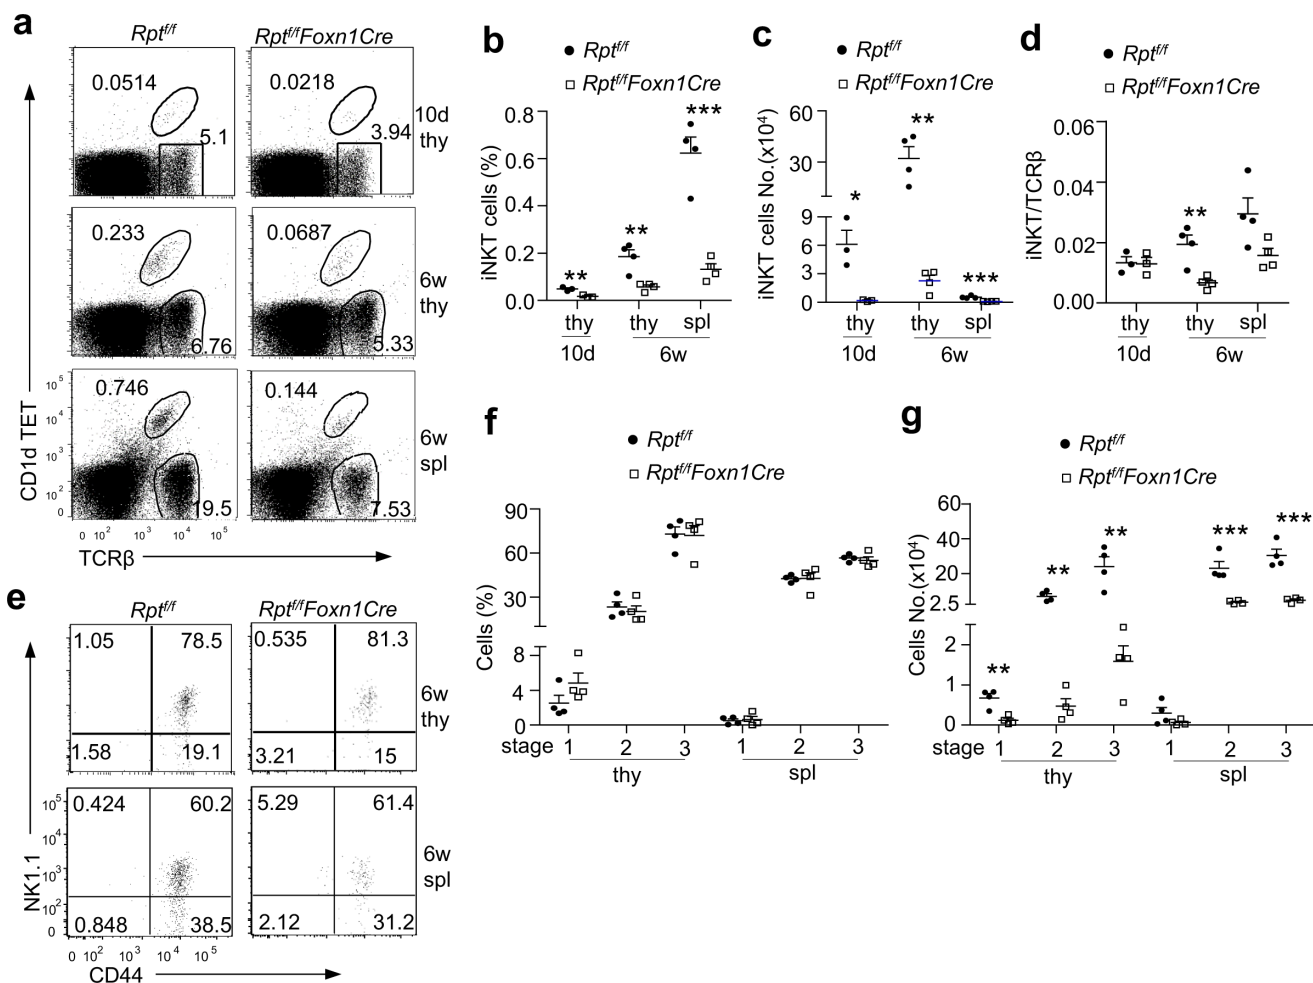

**Fig 7. Severe *i*NKT cell developmental defect in *Rpt<sup>fl/fl</sup>-Foxn1Cre* mice.** Thymocytes and splenocytes from 10-d- or 6-wk-old *Rpt<sup>fl/fl</sup>* (WT) and *Rpt<sup>fl/fl</sup>-Foxn1Cre* (KO) mice were stained with PBS57 loaded CD1d-Tetramer (CD1dTET), TCRβ, and other indicated molecules. **a.** CD1dTET and TCRβ staining of live-gated thymocytes. The gating strategy is shown in [S8A Fig](#). **b.** Percentages of *i*NKT cells. Each circle and square represent one *Rpt<sup>fl/fl</sup>* and *Rpt<sup>fl/fl</sup>-Foxn1Cre* mice, respectively (10 d, *n* = 3; 6 wk, *n* = 4). Horizontal bars represent means and SEM. **c.** Absolute numbers of *i*NKT cells. Each circle and square represent one *Rpt<sup>fl/fl</sup>* and *Rpt<sup>fl/fl</sup>-Foxn1Cre* mice, respectively (10 d, *n* = 3; 6 wk, *n* = 4). Horizontal bars represent means and SEM. **d.** *i*NKT cells to αβT cell ratios in individual mice (10 d, *n* = 3; 6 wk, *n* = 4). **e.** Representative dot plots show CD44 and NK1.1 expression in gated *i*NKT cells. The gating strategy is shown in [S8B Fig](#). **f.** Percentages of indicated *i*NKT cell populations (*n* = 4). **g.** Absolute numbers of indicated *i*NKT cell populations (*n* = 4). Data shown are representative of or are calculated from at least three experiments. \*, *p* < 0.05; \*\*, *p* < 0.01; \*\*\*, *p* < 0.001 determined by tailed Student's *t* test.

doi:10.1371/journal.pbio.1002370.g007

markedly decreased (Fig 7G). Just like in the thymus, *i*NKT cell percentages and numbers were obviously decreased in the spleen (Fig 7A–7C). Together, these observations indicate that *i*NKT cell generation is dependent on mTORC1 signaling in TECs.

## mTORC1/Raptor in TECs Ensures Temporal Control of TCRV $\gamma$ Usage and $\gamma\delta$ T17 Differentiation

Unlike  $\alpha\beta$ T cells, most  $\gamma\delta$ T cells develop independent of the MHC-mediated antigen presentation by TECs [34, 35]. Although  $\gamma\delta$ T cell percentages in *Rpt<sup>fl/fl</sup>-Foxn1Cre* thymi were not obviously altered at 10 d and 6 wk of age (Fig 8A and 8B), total  $\gamma\delta$ T cell numbers were substantially decreased (Fig 8C). However, unlike nTreg and *i*NKT cells,  $\gamma\delta$ T to  $\alpha\beta$ T ratios were not decrease or even slightly increased in *Rpt<sup>fl/fl</sup>-Foxn1Cre* mice (Fig 8D), suggesting that  $\gamma\delta$ T cell generation was dependent on mTORC1 in TECs but appeared less severely affected than nTregs and *i*NKT cells.

Considerable numbers of  $\gamma\delta$ T cells are programmed to differentiate to distinct effector lineages within the thymus [34–36].  $\gamma\delta$ T17 cells are developed mostly in fetal thymus [12, 13]. Similarly, *TCRV $\gamma$ 5*, *V $\gamma$ 6*, and *V $\delta$ 1* only recombine in fetal thymus [11, 14]. Mechanisms that enforce such temporal controls are unknown. In WT thymus,  $\gamma\delta$ T17 cells accounted for about 40% and 5% of total  $\gamma\delta$ T cells at birth and 6 wk of age, respectively. In *Rpt<sup>fl/fl</sup>-Foxn1Cre* mice,  $\gamma\delta$ T17 percentages did not differ greatly at birth but increased 5-fold in adults compared to WT controls (Fig 8E and 8F). Although total thymic  $\gamma\delta$ T17 numbers were decreased in newborn *Rpt<sup>fl/fl</sup>-Foxn1Cre* thymi, they were similar to WT controls when 6 wk old (Fig 8G). Because adult *Rpt<sup>fl/fl</sup>-Foxn1Cre* thymi were much smaller than WT controls, similar total  $\gamma\delta$ T17 cell numbers in these mice suggested that  $\gamma\delta$ T17 generation was greatly favored in adult *Rpt<sup>fl/fl</sup>-Foxn1Cre* thymi, although thymic  $\gamma\delta$ T1 ratio was not altered (Fig 8E and 8H) and  $\gamma\delta$ T1 numbers were obviously decreased in *Rpt<sup>fl/fl</sup>-Foxn1Cre* mice (Fig 8I). Additionally, CD44<sup>+</sup>CD27<sup>-</sup>  $\gamma\delta$ T cells, which were enriched with  $\gamma\delta$ T17 [13], were also increased in *Rpt<sup>fl/fl</sup>-Foxn1Cre* thymi (Fig 8J). Concordantly,  $\gamma\delta$ T17 but not  $\gamma\delta$ T1 percentages in splenic, lung, and liver  $\gamma\delta$ T cells were also increased in *Rpt<sup>fl/fl</sup>-Foxn1Cre* mice (Fig 8K and 8L). To determine whether Cre protein expression in TECs was sufficient to cause enhanced  $\gamma\delta$ T17 generation, we compared  $\gamma\delta$ T1/17 differentiation in *Rpt<sup>+/+</sup>-Foxn1Cre* mice and *Rpt<sup>+/+</sup>* mice. As shown in S10A–S10D Fig, *Rpt<sup>+/+</sup>-Foxn1Cre* thymic  $\gamma\delta$ T cells were not obviously different from *Rpt<sup>+/+</sup>* thymic  $\gamma\delta$ T cells in percentages and numbers as well as in  $\gamma\delta$ T1 and  $\gamma\delta$ T17 percentages, suggesting that Cre expression in TECs per se was not able to cause the abnormalities in *Rpt<sup>fl/fl</sup>-Foxn1Cre* mice. Together, these observations revealed that mTORC1/Raptor in TECs prevented  $\gamma\delta$ T17 generation in the adult thymus.

Coinciding with the loss of temporal control of  $\gamma\delta$ T17 differentiation, *V $\gamma$ 5*, *V $\gamma$ 6*, and *V $\delta$ 1* recombination, which occurs only in fetal thymi in WT mice, occurred at high levels in adult *Rpt<sup>fl/fl</sup>-Foxn1Cre* thymi (Fig 9A and 9B). Although  $\gamma\delta$ T subsets defined by TCRV $\gamma$  usages were similar in newborn WT and *Rpt<sup>fl/fl</sup>-Foxn1Cre* thymi (Fig 9C, S12 Fig), they were obviously different in adult thymi (Fig 9D and 9E). Both *V $\gamma$ 6V $\delta$ 1<sup>+</sup>* and *V $\gamma$ 5<sup>+</sup>* subsets were increased, but *V $\gamma$ 4<sup>+</sup>* subsets were decreased in relative ratios in adult *Rpt<sup>fl/fl</sup>-Foxn1Cre* thymi compared with WT controls; thus, mTORC1/Raptor in TECs enforced strict restriction of fetal-specific *V $\gamma$ 5/6/V $\delta$ 1* recombination.

In newborn thymi, we observed similarly high percentages of  $\gamma\delta$ T17 cells that were either *V $\gamma$ 4<sup>+</sup>* or *V $\gamma$ 6<sup>+</sup>*, which accounted for most of  $\gamma\delta$ T17 cells in a normal fetal thymus [12], in both WT and *Rpt<sup>fl/fl</sup>-Foxn1Cre* mice (Fig 9F and 9G). There were no obvious differences in  $\gamma\delta$ T17 percentages in *V $\gamma$ 1<sup>+</sup>*, *V $\gamma$ 4<sup>+</sup>*, *V $\gamma$ 5<sup>+</sup>*, and *V $\gamma$ 6V $\delta$ 1<sup>+</sup>* populations of  $\gamma\delta$ T cells between newborn WT and *Rpt<sup>fl/fl</sup>-Foxn1Cre* thymi. However,  $\gamma\delta$ T cells in adult *Rpt<sup>fl/fl</sup>-Foxn1Cre* thymi showed

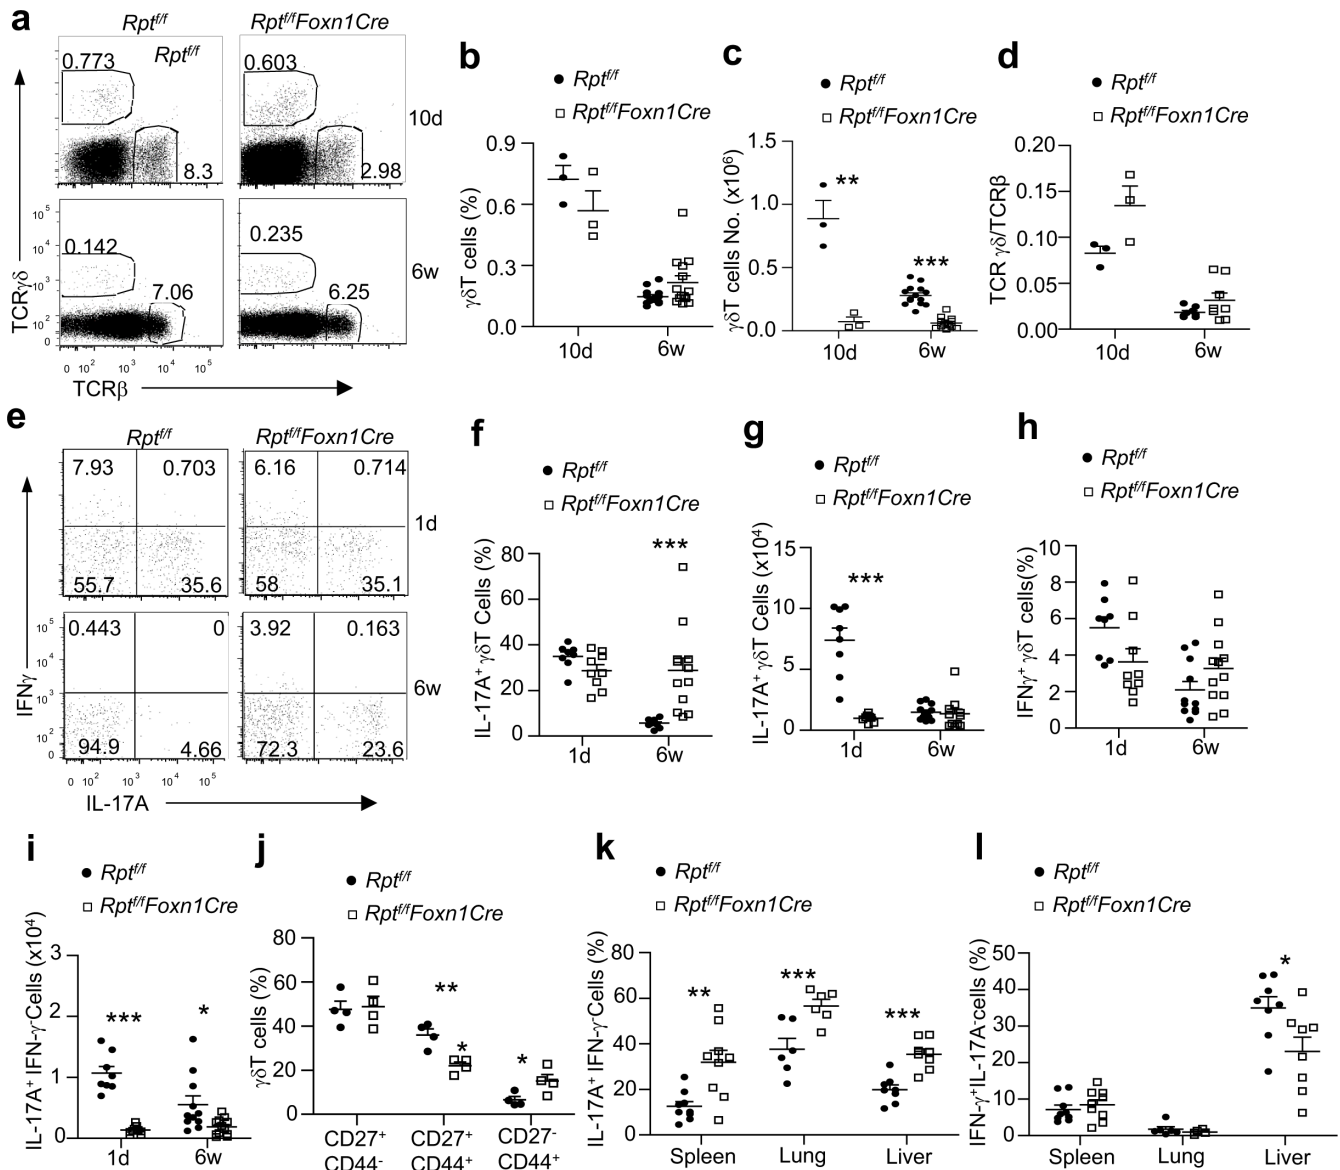

**Fig 8. Enhanced  $\gamma\delta$ T17 lineage differentiation in adult mTORC1/Raptor deficient mice.** **a**. Representative dot plots showing TCR $\gamma\delta$  and TCR $\beta$  expression in 10-d- and 6-wk-old WT and *Rpt<sup>fl/fl</sup>-Foxn1Cre* thymocytes. The gating strategy is shown in S9A Fig. **b**. Scatter plots show  $\gamma\delta$ T percentages in 10-d- and 6-wk-old WT and *Rpt<sup>fl/fl</sup>-Foxn1Cre* thymus (10 d,  $n = 3$ ; 6 wk,  $n = 4$ ). Each circle and square represents one WT and *Rpt<sup>fl/fl</sup>-Foxn1Cre* mouse, respectively. Bars represent mean  $\pm$  SEM. **c**. Scatter plots show  $\gamma\delta$ T numbers in 10-d- and 6-wk-old WT and *Rpt<sup>fl/fl</sup>-Foxn1Cre* thymus (10 d,  $n = 3$ ; 6 wk,  $n = 4$ ). Each circle and square represents one WT and *Rpt<sup>fl/fl</sup>-Foxn1Cre* mouse, respectively. Bars represent mean  $\pm$  SEM. **d**.  $\gamma\delta$ T/ $\text{cd}\beta$ T ratios in the thymus. **e–g**. Enhanced  $\gamma\delta$ T17 differentiation in *Rpt<sup>fl/fl</sup>-Foxn1Cre* mice. Thymocytes from newborn (1 d) and 6-wk-old WT and *Rpt<sup>fl/fl</sup>-Foxn1Cre* mice were stimulated with phorbol myristate acetate (PMA) plus ionomycin in the presence of GolgiPlug for 4 h. Dot plots show intracellular IFN $\gamma$  and IL-17A staining in gated TCR $\gamma\delta^+$ CD3 $^+$  cells (e). The gating strategy is shown in S9B Fig. Scatter plots represent mean  $\pm$  SEM of  $\gamma\delta$ T17-cells (f, percentages; g, numbers) and  $\gamma\delta$ T1-cells (h, percentages; i, numbers). **j**. Altered  $\gamma\delta$ T cell subsets in *Rpt<sup>fl/fl</sup>-Foxn1Cre* mice. Scatter plots show percentages of the CD27 $^+$ CD44 $^-$ , CD27 $^+$ CD44 $^+$ , and CD27 $^-$ CD44 $^+$  populations of thymic  $\gamma\delta$ T cells from 6-wk-old WT and *Rpt<sup>fl/fl</sup>-Foxn1Cre* mice, respectively. Bars represent mean  $\pm$  SEM. **k, l**. Increased  $\gamma\delta$ T17 cells in peripheral organs in *Rpt<sup>fl/fl</sup>-Foxn1Cre* mice. Splenocytes, lung, and liver mononuclear cells from 6–8-wk-old mice were stimulated and analyzed similarly as in e–g. Scatter plots represent mean  $\pm$  SEM of  $\gamma\delta$ T17 cells (k) and  $\gamma\delta$ T1 cells (l). Data shown represent or are calculated from at least three experiments. \*,  $p < 0.05$ ; \*\*,  $p < 0.01$ ; \*\*\*,  $p < 0.001$  determined by two-tailed Student's  $t$  test.

doi:10.1371/journal.pbio.1002370.g008

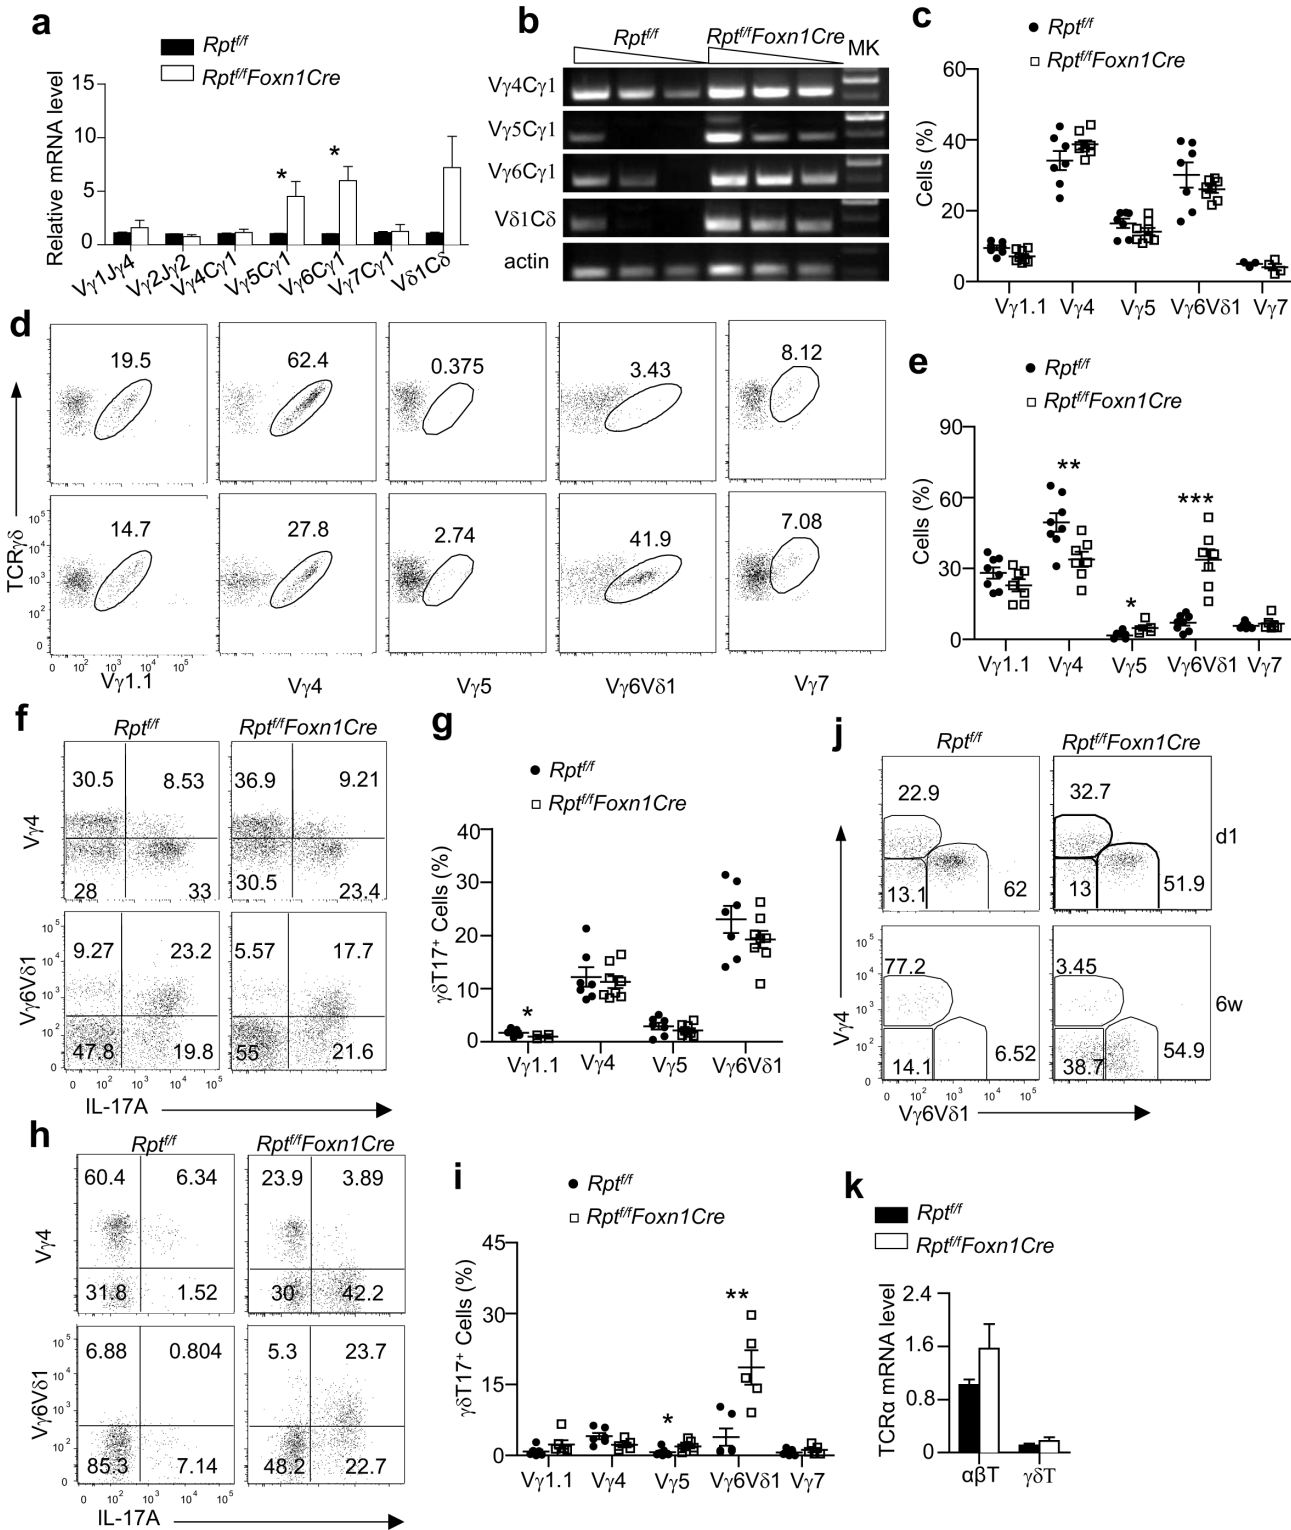

**Fig 9. Impaired temporal control of fetal-specific TCRVγδ recombination and Vγ6Vδ1<sup>+</sup> γδT17 differentiation in mTORC1/Raptor-deficient mice.** Thymocytes from newborn or 6–10-wk-old adult *Rpt<sup>fl/fl</sup>* and *Rpt<sup>fl/fl</sup>-Foxn1Cre* mice were used for sorting γδT cells (a,b,k) and αβT cells (k), for directly assessing Vγ usages of γδT cells after cell surface staining (c–e), or for assessing Vγ usage of γδT17 cells after PMA plus ionomycin stimulation for 4 h (f–j). **a,b.** *Vγ1-Jγ4*, *Bγ2-Jγ2*, *Vγ4-Cγ1*, *Vγ5-Cγ1*, *Vγ6-Cγ1*, *Vγ7-Cγ1*, and *Vδ1-Cδ* mRNAs in sorted thymic γδT cells from 2-mo-old mice were quantified by real-time qPCR (a) and semiquantitative PCR (b). Data shown are mean ± SEM calculated from three experiments (a) or are representative of three experiments (b). Sorting strategy is shown in [S11A Fig](#). **c.** TCRVγ distribution in newborn thymic γδT cells. **d,e.** TCRVγ distribution in adult thymic γδT cells. Dot plots

show TCR $\gamma\delta$  and indicated V $\gamma$  staining in gated TCR $\gamma\delta^+$  cells (d). Scatter graphs show individual V $\gamma$  subsets within  $\gamma\delta$ T cells. Bars represent mean  $\pm$  SEM (e). The gating strategy is shown in [S11B Fig. f](#). Representative dot plots show IL-17A and V $\gamma$ 4 or V $\gamma$ 6V $\delta$ 1 expression in gated newborn thymic  $\gamma\delta$ T cells after PMA plus ionomycin stimulation for 4–5 h in the presence of GolgiPlug. Data shown represent at least three experiments. The gating strategy is shown in [S11C Fig. g](#). TCRV $\gamma$  distribution of thymic  $\gamma\delta$ T17 cells in newborn mice. Scatter plots represent mean  $\pm$  SEM of V $\gamma$  subsets of  $\gamma\delta$ T17 cells. Data shown represent or are calculated from three experiments. **h**. Representative dot plots show IL-17A and V $\gamma$ 4 or V $\gamma$ 6V $\delta$ 1 expression in gated thymic  $\gamma\delta$ T cells from adult mice after PMA plus ionomycin stimulation for 4 h in the presence of GolgiPlug. Data shown represent at least three experiments. The gating strategy is shown in [S11D Fig. i](#). TCRV $\gamma$  distribution of thymic  $\gamma\delta$ T17 cells in adult mice. This is the same as in [Fig 9G](#), except 6–10-wk-old mice were tested and the V $\gamma$ 7 $^+$  subset was included. **j**. Representative dot plots show V $\gamma$ 4 and V $\gamma$ 6V $\delta$ 1 staining of gated  $\gamma\delta$ T17 cells from newborn and adult thymi. The gating strategy is shown in [S11E Fig. k](#). TCR $\alpha$  mRNA levels in sorted  $\gamma\delta$ T and  $\alpha\beta$ T cells from adult thymi detected by real-time qPCR. Data shown represent or are calculated from at least three experiments. \*,  $p < 0.05$ ; \*\*,  $p < 0.01$ ; \*\*\*,  $p < 0.001$  determined by two-tailed Student's  $t$  test.

doi:10.1371/journal.pbio.1002370.g009

substantially increased V $\gamma$ 6V $\delta$ 1 $^+$  and V $\gamma$ 5 $^+$   $\gamma\delta$ T17 cells ([Fig 9H and 9I](#)). Most newborn  $\gamma\delta$ T17 cells were either V $\gamma$ 4 $^+$  or V $\gamma$ 6V $\delta$ 1 $^+$  in both WT and *Rpt<sup>fl/fl</sup>-Foxn1Cre* mice. However, V $\gamma$ 6V $\delta$ 1 $^+$   $\gamma\delta$ T cells accounted for the majority of  $\gamma\delta$ T17 cells in *Rpt<sup>fl/fl</sup>-Foxn1Cre* thyme, and this population of  $\gamma\delta$ T17 cells was 4-fold greater in *Rpt<sup>fl/fl</sup>-Foxn1Cre* thymi than in WT control ([Fig 9J](#)). A significant portion of  $\gamma\delta$ T17 cells in adult *Rpt<sup>fl/fl</sup>-Foxn1Cre* thymi was V $\gamma$ 4 $^-$  V $\gamma$ 6V $\delta$ 1 $^-$ , which could be other V $\gamma$  subsets or poorly stained V $\gamma$ 6V $\delta$ 1 $^+$  cells. However, they were unlikely  $\alpha\beta$ T cells because they were TCR $\beta^-$ . Moreover,  $\gamma\delta$ T cells sorted from adult WT and *Rpt<sup>fl/fl</sup>-Foxn1Cre* thymi expressed similarly low levels of TCR $\alpha$  compared with  $\alpha\beta$ T cells ([Fig 9K](#)).

One possible reason for increased  $\gamma\delta$ T17 cells in *Rpt<sup>fl/fl</sup>-Foxn1Cre* adult thymi could be selective expansion of these cells in the thymus after they were generated in the fetus and in neonate. However, thymic  $\gamma\delta$ T cells or CD44 $^-$ CD27 $^+$ , CD44 $^+$ CD27 $^+$ , and CD44 $^+$ CD27 $^-$   $\gamma\delta$ T subsets from *Rpt<sup>fl/fl</sup>-Foxn1Cre* mice incorporated BrdU at similar rates as their respective WT controls ([Fig 10A–10C](#)). Since  $\gamma\delta$ T17 cells reside mainly in the CD44 $^+$ CD27 $^-$  subset, these observations suggested that the relative increase of  $\gamma\delta$ T17 cells was not likely caused by selective expansion of these cells in *Rpt<sup>fl/fl</sup>-Foxn1Cre* mice. Another potential but not mutually exclusive possibility was that mTORC1 deficiency in TECs caused selective retention of V $\gamma$ 6 $^+$ V $\delta$ 1 $^+$   $\gamma\delta$ T cell/ $\gamma\delta$ T17 cells generated in the fetal thymus, leading to an increase of these cells in the adult *Rpt<sup>fl/fl</sup>-Foxn1Cre* thymus. To address this possibility, we generated chimerical mice by reconstituting lethally irradiated *Rpt<sup>fl/fl</sup>* and *Rpt<sup>fl/fl</sup>-Foxn1Cre* mice with bone marrow from CD45.1 $^+$ CD45.2 $^+$  WT mice. Five to six weeks after transfer, *Rpt<sup>fl/fl</sup>-Foxn1Cre* recipient mice displayed a small thymus ([Fig 10D](#)), decreased total thymic total cellularity ([Fig 10E](#)) and comparable percentages, but decreased numbers of donor-derived CD45.1 $^+$  thymocyte subsets based on CD4 and CD8 staining ([Fig 10F–10H](#)). Donor-derived CD45.1 $^+$   $\gamma\delta$ T cell percentages were similar, but the numbers were decreased in *Rpt<sup>fl/fl</sup>-Foxn1Cre* recipients compared with *Rpt<sup>fl/fl</sup>* recipients ([Fig 10I–10K](#)). Importantly,  $\gamma\delta$ T17 cell percentages were increased 4–8-fold in donor-derived  $\gamma\delta$ T cells in the *Rpt<sup>fl/fl</sup>-Foxn1Cre* recipient thymus and spleen when compared with *Rpt<sup>fl/fl</sup>* recipients ([Fig 10L](#)). Thus, generation of fetal restricted  $\gamma\delta$ T17 cells from WT hematopoietic stem cells from adult bone marrow was enhanced in adult thymi when mTORC1 was absent in TECs. Furthermore, percentages of V $\gamma$ 5 $^+$  and V $\gamma$ 6V $\delta$ 1 $^+$  cell in donor-derived  $\gamma\delta$ T cells from *Rpt<sup>fl/fl</sup>-Foxn1Cre* recipient thymi appeared higher than those in donor-derived  $\gamma\delta$ T cells from *Rpt<sup>fl/fl</sup>* recipient mice, while V $\gamma$ 1.1 $^+$  and V $\gamma$ 4 $^+$   $\gamma\delta$ T cell percentages were similar between these two groups ([Fig 10M](#)), suggesting that generation of fetal restricted V $\gamma$ 5/V $\gamma$ 6  $\gamma\delta$ T cells from WT hematopoietic stem cells from adult bone marrow might be increased in adult TEC specific mTORC1 deficient thymi.

### Decreased ETPs and Thymotropic Chemokines in *Rpt<sup>fl/fl</sup>-Foxn1Cre* Thymus

T cell development initiates after ETPs take residence in the thymus [10]. Severe impairment of multilineage T cell generation without obvious blockade at specific developmental stages



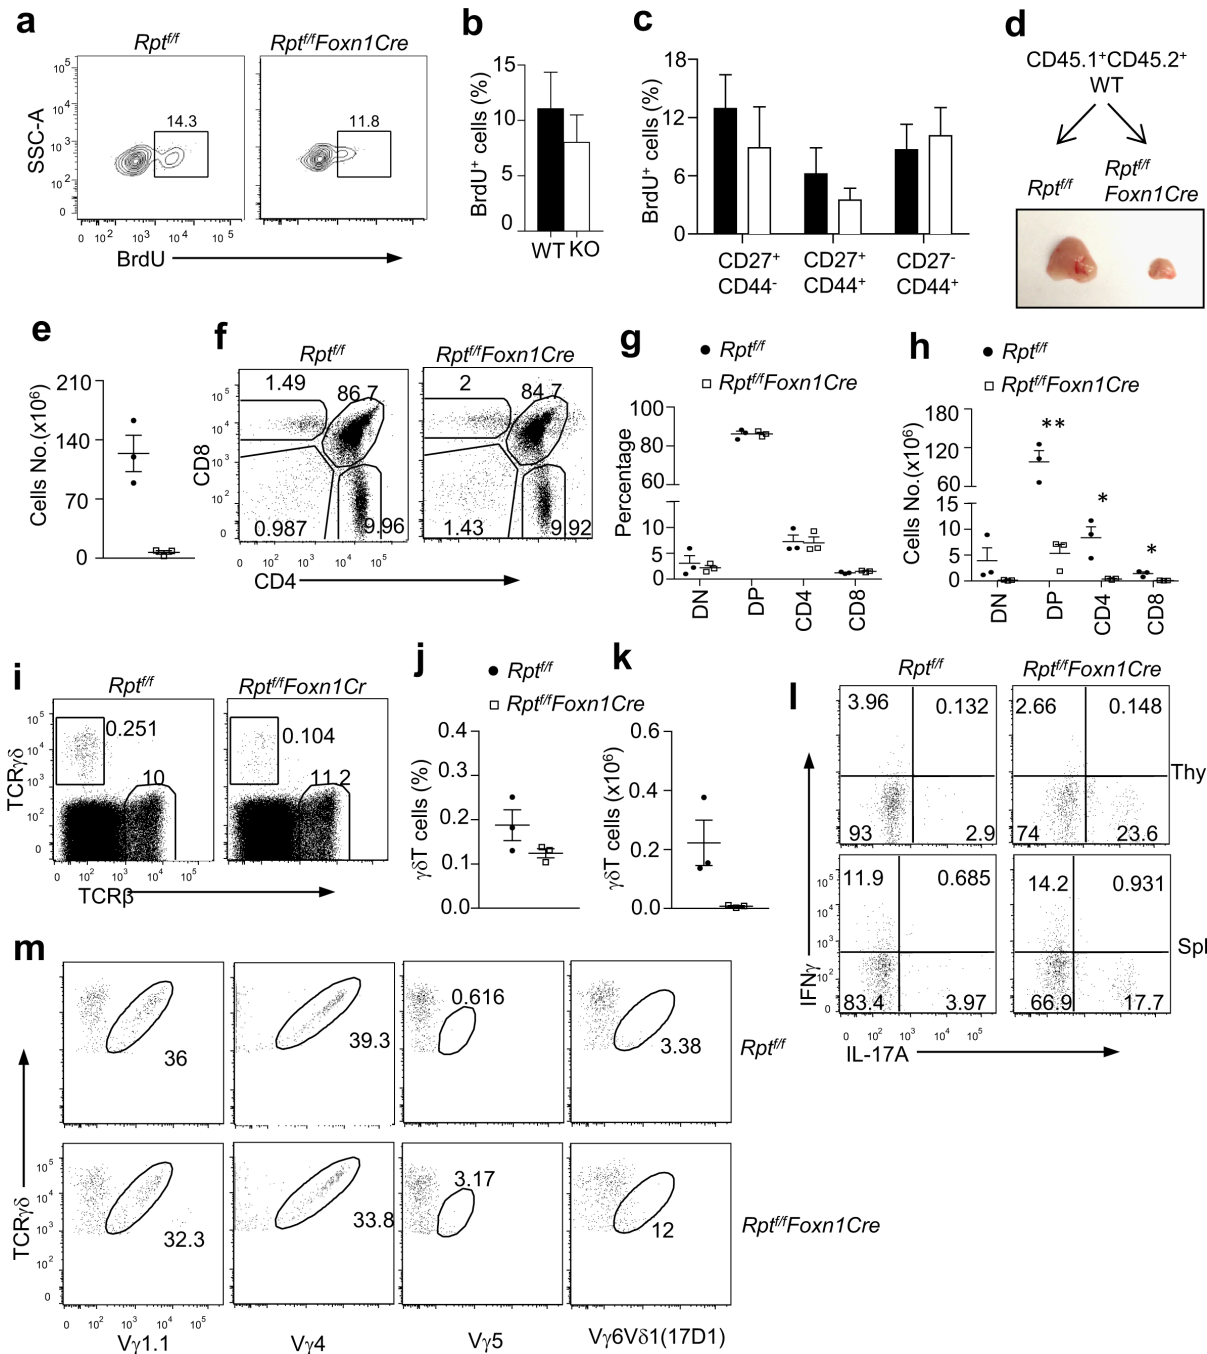

**Fig 10. Adult *Rpt<sup>fl/fl</sup>-Foxn1Cre* thymi support  $\gamma$ T17 and V $\gamma$ 6V $\delta$ 1  $\gamma$ T cell generation from adult bone marrow.** a–c. BrdU incorporation in thymic  $\gamma$ T cells. Three-week-old mice were i. p. injected with 1 mg BrdU in 200  $\mu$ l PBS for 4 h before euthanization for thymocyte staining. Scatter plot shows percentages of BrdU<sup>+</sup> cells in indicated populations ( $n = 4$ ). a. Representative dot plots showing BrdU incorporation in gated  $\gamma$ T cells. The gating strategy is shown in S13A Fig. b. Bar graphs represent mean  $\pm$  SEM of percentages of BrdU<sup>+</sup>  $\gamma$ T cells. c. Bar graphs represent mean  $\pm$  SEM of percentages of BrdU<sup>+</sup> cells in the indicated  $\gamma$ T subsets. d–m. Lethally irradiated *Rpt<sup>fl/fl</sup>-Foxn1Cre* and *Rpt<sup>fl/fl</sup>* mice were reconstituted with T cell-depleted bone marrow cells from CD45.1<sup>+</sup>CD45.2<sup>+</sup> WT mice. Five to six weeks after reconstitution, thymocytes and splenocytes from recipient mice were collected for fluorescence-activated cell sorting (FACS) analysis before or after PMA plus ionomycin stimulation. d. Thymus from recipient mice. e. Total thymic cellularity. f. Thymic subsets based on CD4 and CD8 staining. Representative dot plots of live-gated CD45.1<sup>+</sup> thymocytes are shown. The gating strategy is shown in S13B Fig. g. Scatter plot shows percentages of individual thymocyte subsets. h. Cell numbers of CD45.1<sup>+</sup> donor-derived thymic subsets. i. Representative dot plots show TCR $\beta$  and TCR $\gamma$  staining of live gated CD45.1<sup>+</sup> donor-derived thymocytes. The gating strategy is the same as in S13C Fig. j. CD45.1<sup>+</sup> donor-derived  $\gamma$ T cell percentages in thymi. k. CD45.1<sup>+</sup> donor-derived  $\gamma$ T cell numbers in thymi. l. Representative dot plots showing IL-17A and IFN $\gamma$  staining in gated CD45.1<sup>+</sup> donor-derived thymic and splenic  $\gamma$ T cells. The gating strategy is same as S13C Fig. m. TCRV $\gamma$  staining in gated CD45.1<sup>+</sup> donor-derived  $\gamma$ T cells. The gating strategy is shown in S13D Fig. Data shown represent or are calculated from three experiments. Together, our data demonstrated that mTORC1/

Raptor in TECs fostered a thymic environment that enforced temporal control on  $\gamma\delta$ T17 differentiation and might play an important role for strict restriction of fetal-specific  $V\gamma 5/6/V\delta 1$  recombination.

doi:10.1371/journal.pbio.1002370.g010

prompted us to examine if ETPs in the thymus were altered in  $Rpt^{ff}/Foxn1Cre$  mice. The relative ratios of ETP ( $Lin^- cKit^{++} CD25^- CD24^+ CD44^+$ ), DN2 ( $cKit^+ CD44^+ CD25^+$ ), DN3 ( $CD44^- CD25^+$ ), and DN4 ( $CD44^- CD25^-$ ) subsets within  $Rpt^{ff}/Foxn1Cre$   $Lin^-$  thymocytes did not deviate greatly from E16 fetus, 3-wk- and 6-wk-old mice in the control group (Fig 11A and 11B). This suggests there was no obvious developmental blockade from ETP to DN4. However, ETPs and other DN subsets in fetal and postnatal  $Rpt^{ff}/Foxn1Cre$  thymi were decreased in numbers (Fig 11C–11E).  $Rpt^{ff}/Foxn1Cre$  ETPs showed no obvious defect in survival (Fig 11F). However, ETPs but not other DN subsets, displayed impaired BrdU incorporation (Fig 11G and 11H), suggesting decreased in vivo expansion of ETPs when mTORC1 was absent in TECs. Migration of ETPs to the thymus requires signals from CXCR4, CCR7, and CCR9, and their cognate ligands [37–40]. In E16 thymi (Fig 11I), as well as in sorted postnatal d10 TECs (Fig 11J), expression of these chemokines was considerably decreased in the absence of mTORC1. Together, these observations suggested that mTORC1 might, at least in part, enhance expression of multiple thymotropic chemokines in TECs for recruitment of ETPs to the thymus and promote ETP expansion for efficient T cell generation.

## Discussion

We demonstrated here that mTORC1 in TECs is pivotal for normal thymopoiesis and for establishing a thymic environment to foster proper T cell generation. Deficiency of mTORC1 in TECs resulted in severe thymic atrophy, decreased TEC numbers, abnormal thymic architecture, and decreased mTEC/cTEC ratios, leading to reduced ETPs in the thymus, impaired generation of virtually all T cell lineages, and defective temporal control of  $\gamma\delta$ T17 differentiation and fetal restricted  $TCRV\gamma/V\delta$  recombination.

Using *Foxn1Cre*-mediated deletion, we have revealed that mTORC1 may control multiple aspects of TEC biology. First, mTORC1 is important for TEC expansion and its deficiency leads to decreased TEC numbers in both fetal and adult  $Rpt^{ff}/Foxn1Cre$  mice. Such function of mTORC1 in TECs is consistent with its role in cell cycle entry and synthesis of building blocks critical for cell growth and expansion [21]. Second, mTORC1 promotes late-stage TEC maturation indicated by decreased relative ratios of MHC-II<sup>hi</sup>CD40<sup>hi</sup> TECs in  $Rpt^{ff}/Foxn1Cre$  mice. Although not examined in the current study, decreased mature TEC numbers likely affect thymic selection and T cell repertoire. Third, mTORC1 controls the balance between mTECs and cTECs and ensures establishing predominance of mTECs over cTECs. Finally, mTORC1 may augment the recruitment of ETPs to the thymus by increasing CXCL12, CCL21, and CCL25 expression in TECs and promote ETP expansion in the thymus through mechanism(s) yet to be defined.

Using  $Rpt^{ff}/ERCre$  mice, we have also shown that acute deletion of mTORC1 in adult mice quickly causes severe thymic atrophy, altered thymic architecture, and substantial reduction of DP thymocytes within one week. Our data are consistent with previous observations that rapamycin treatment induces thymic atrophy and DP thymocyte death in mice [41]. Since TEC numbers are not obviously reduced and thymocyte-specific deletion of *Raptor* does not affect thymus size and total cellularity [28], we propose that mature TEC function relies on mTORC1 activity to ensure DP thymocyte survival. Due to shortened life span of  $Rpt^{ff}/ERCre$  mice after tamoxifen injection, our results do not rule out a potential role of mTORC1 for mature c/mTEC homeostasis after prolonged deletion. It is important to point out that a recent study has found severe thymic atrophy in the same strain of mice 2–3 wk after tamoxifen injection

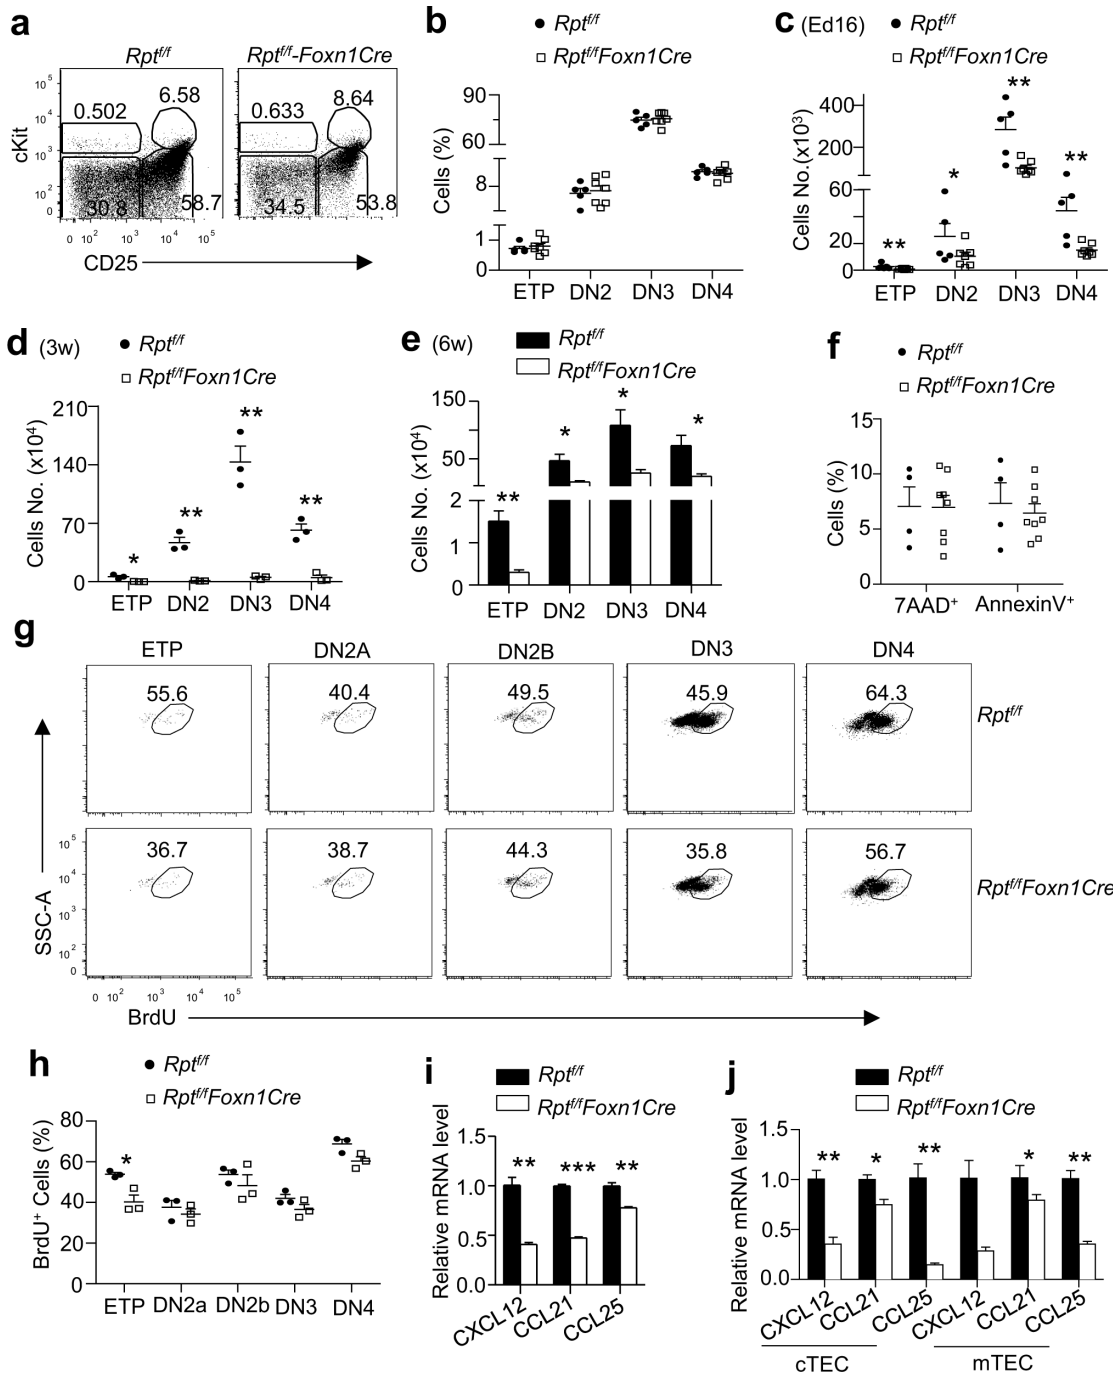

**Fig 11. Decreased ETPs in mTORC1/Raptor-deficient thymi.** **a.** Representative dot plots showing cKit and CD25 expression on live gated Lin<sup>+</sup>(CD4<sup>-</sup>CD8<sup>-</sup>CD3<sup>-</sup>TCRβ<sup>-</sup>B220<sup>-</sup>CD19<sup>-</sup>TCRγδ<sup>-</sup>NK1.1<sup>-</sup>CD11b<sup>-</sup>CD11c<sup>-</sup>Gr1<sup>-</sup>Ter119<sup>-</sup>) CD24<sup>+</sup> thymocytes from E16 *Rpt<sup>fl/fl</sup>* and *Rpt<sup>fl/fl</sup>-Foxn1Cre* fetuses. The gating strategy is shown in [S14A Fig](#). **b,c.** ETP and DN subset percentages (b) and numbers (c) in E16 fetuses. **d,e.** Numbers of ETP and DN subsets in 3-wk- (d) and 6-wk- (e) old *Rpt<sup>fl/fl</sup>* and *Rpt<sup>fl/fl</sup>-Foxn1Cre* mice. **f.** ETP death rate revealed by annexin V and 7-AAD staining. **g,h.** BrdU incorporation in ETP and DN subsets. Mice with 16-d pregnancy were i. p. injected with BrdU (3 mg in 200 μl PBS) and fetal thymi were harvested 6 h after injection for intracellular BrdU staining. The gating strategy is shown in [S14B Fig](#). **g.** Representative dot plots of BrdU staining in gated subsets. **h.** BrdU percentages in the indicated DN subsets calculated from one litter of fetuses. **i,j.** Relative levels of thymotropic chemokines in E16 total thymi (i) and in sorted TECs from 10-d-old mice (j). Data shown represent or are calculated from at least three experiments (a–h) or two experiments (i,j). \*, *p* < 0.05; \*\*, *p* < 0.01; \*\*\*, *p* < 0.001 determined by two-tailed Student's *t* test.

doi:10.1371/journal.pbio.1002370.g011

and has attributed thymic atrophy to early T cell developmental blockade [28]. TECs and thymic architecture were not evaluated in that study. Our conclusion is not in conflict with that study, as hematopoiesis can be greatly impacted even after one week of tamoxifen treatment in these mice [42]. Nevertheless, to firmly establish the role of mTORC1 in mature TECs and how it promotes DP thymocytes survival, selective deletion of *Raptor* in mature TECs is required.

An important question that remains to be addressed is how mTORC1 controls TEC development and function. The transcription factor *Foxn1* is essential for TEC development and thymopoiesis [7, 19] as well as for thymus maintenance [43, 44]. *Aire* is required for mTEC development and function [45]. Expression of these two molecules in TECs is not decreased in mTORC1 deficient mice (Fig 4E and S15 Fig). However, mTORC1 also controls nuclear translocation of multiple molecules [24], so our data do not rule out that mTORC1 may regulate the localization and function of these molecules. mTORC1 regulates the expression/activity of many other molecules [21]. The impairment of thymopoiesis and T cell development in mTORC1-deficient mice likely compounds the effects of multiple abnormalities.

Although the generation of virtually all T cell lineages is impaired in *Rpt<sup>fl/fl</sup>-Foxn1Cre* mice, individual T cell lineages appear to display differential sensitivities to mTORC1 deficiency in TECs. *i*NKT cells appear most stringently dependent on mTORC1 signaling in TECs, which is surprising, because their positive selection relies on engagement of the *i*V $\alpha$ 14TCR with self-lipid ligands presented by CD1d expressed on DP thymocytes in the cortex rather than TECs [32]. CD1d expression on and *V $\alpha$ 14-J $\alpha$ 18* recombination in DP thymocytes were not obviously affected in *Rpt<sup>fl/fl</sup>-Foxn1Cre* mice (S16 Fig). A recent study found that mTECs produce IL-15 to promote late stage *i*NKT cell development [33]. In *Rpt<sup>fl/fl</sup>-Foxn1Cre* mice, there was no obvious *i*NKT cell developmental blockade at a late stage, suggesting that mTORC1 in TECs may function through other mechanism(s) to promote early *i*NKT cell development. Similar to *i*NKT cells, nTregs are more sensitive than  $\alpha\beta$ T cells to mTORC1 deficiency. nTreg differentiation depends on self-peptide-MHC-II presented by or derived from mTECs [3, 4]. The disproportional decrease in the number of mTECs as well as reduction of mature mTECs in *Rpt<sup>fl/fl</sup>-Foxn1Cre* thymus may contribute to a more severe impairment of nTreg generation. Furthermore, a thymic environment such as local TGF $\beta$  and CD80/86-mediated costimulation modulates nTreg generation [46, 47]. Altered thymic environment in *Rpt<sup>fl/fl</sup>-Foxn1Cre* mice could also contribute to nTreg deficiency.

Immune cells undergo specific switches during development [48]. Among them are  $\gamma\delta$ T17 cell differentiation and *TCRV $\gamma$ 5*, *V $\gamma$ 6*, and *V $\delta$ 1* recombination, which predominantly or strictly occur in fetal thymus and are switched off in adult thymus [12–15]. Mechanisms that enforce such temporal controls or developmental switch are unknown. We demonstrated that TEC-specific deletion of mTORC1 results in a loss of fetal restriction on  $\gamma\delta$ T17 differentiation and recombination of *V $\gamma$ 5/6/V $\delta$ 1*, leading to uncontrolled  $\gamma\delta$ T17-cell generation and *V $\gamma$ 5/6/V $\delta$ 1* recombination in adulthood. Our data suggest that mTORC1 controls TECs to enforce such temporal *V $\gamma$ 5/6/V $\delta$ 1* recombination and  $\gamma\delta$ T17 generation. Interestingly, a recent report has also found impaired temporal control of  $\gamma\delta$ T17 differentiation and *V $\gamma$ /V $\delta$*  recombination in adult  $\beta$ 5t mutant mice [49]. Thus, although it has been previously suggested that fetal hematopoietic stem cells contain yet unknown properties that confer fetus specificity of *V $\gamma$ 5/6/V $\delta$ 1* usages in an in vitro culture system [50], our data and those from Nitta et al. [49] suggest that thymic environment, particularly TECs, rather than fetal bone marrow hematopoietic stem cells (HSCs) ensures temporal control of  $\gamma\delta$ T development. Interestingly,  $\beta$ 5t mutation selectively impairs cTEC development to cause dysregulation of  $\gamma\delta$ T17 cell generation in adult mice [49]. Because cTECs are relatively enriched in adult *Rpt<sup>fl/fl</sup>-Foxn1Cre* mice, it is possible that mTORC1 may play a crucial role in cTECs to restrain *V $\gamma$ 6<sup>+</sup>*  $\gamma\delta$ T17 cell generation in adult thymi.

Important issues to be addressed in the future are how specific determinants in TECs dictate temporal control of  $\gamma\delta$ T cell development and how mTORC1 signaling impact on these

determinants. A potential possibility is that fetal and adult TECs are qualitatively different in a way that only fetal TECs confer an environment suitable for  $\gamma\delta$ T17 differentiation and for opening *V $\gamma$ 5/6V $\delta$ 1* chromatin for recombination. If this is true, mTORC1 may play an important role in the transition of TECs from fetal stage, which may be young and permissive for  $\gamma\delta$ T17 differentiation and *TCRV $\gamma$ 5/6/V $\delta$ 1* recombination, to adult TECs, which are aged and impermissive for  $\gamma\delta$ T17 differentiation and *TCRV $\gamma$ 5/6/V $\delta$ 1* recombination.  $\gamma\delta$ T17 differentiation requires transcription factor ROR $\gamma$ t and signals from Notch, TGF $\beta$ , and LT $\beta$ R but not TCR [13, 51, 52] and is opposed by IL-15R $\alpha$  signaling [53]. Whether mTORC1 acts on TECs to influence these signal mechanisms to confer temporal control of  $\gamma\delta$ T17 differentiation is unknown at present. Nevertheless, our data provide genetic evidence that TECs nurture a thymic environment that limits postnatal  $\gamma\delta$ T17 differentiation and *V $\gamma$ 5/6V $\delta$ 1* recombination in an mTORC1-dependent manner.

Despite its importance, thymus undergoes involution or atrophy with advanced age or under certain pathological conditions. Thymic involution leads to a decrease in T cell production and shrinking of the T cell repertoire, which can result in impairment of adaptive immunity and propensity for autoimmunity [54, 55]. Altered TECs can either cause or prevent thymic involution/atrophy [43, 44, 56]. Given the roles of mTORC1 in TECs for thymopoiesis and thymus homeostasis, and the decline of mTORC1 signaling in TECs with age (Fig 1A), it is reasonable to speculate that gradual decreases of mTORC1 activity in TECs may contribute to thymic involution, and increases of mTORC1 activity might delay or prevent thymic involution. These hypotheses warrant further investigation. Additionally, rapamycin and its derivatives are utilized extensively in organ transplantation and cancer therapy. Their potential effects on thymic function should be taken into consideration.

## Materials and Methods

### Ethics Statement

Mouse experiments described were approved by the Institutional Animal Care and Use Committee of Duke University. Mice were euthanized with CO<sub>2</sub> for experiments.

### Mice

*Rptor<sup>ff</sup>* mice [57] were purchased from the Jackson laboratory and further backcrossed to C57Bl/6J background for at least four generations. *Foxn1Cre* mice [29] were kindly provided by Dr. Nancy Manley at the University of Georgia. *Rpt<sup>ff</sup>-Rosa26-ERCre* mice were previously reported [24, 58]. For ERCre mediated deletion, mice were i. p. injected with 200  $\mu$ l 10 mg/ml tamoxifen on day 1, 2, and 5 and euthanized on day 8. Mice after overnight mating with virgin plug in the next morning were designated as gestation day 1. All animals were housed in specific pathogen-free conditions. Experiments described were approved by the Institutional Animal Care and Use Committee of Duke University.

### Preparation of TEC and Other Single Cell Suspension

TECs were prepared according to a published protocol with modifications [59]. In brief, thymi were cut into 2 mm pieces and directly digested in 2 ml digestion buffer (250  $\mu$ l 10mg/ml collagenase type IV (Worthington), 40  $\mu$ l 50mg/ml DNase I (Worthington) and 1.71ml FBS-free RPMI-1640) at 37°C with constant orbital shaking at 150–200 rpm for 15 min. After gentle vortex, remnants were allowed to settle down; the supernatants were collected and kept on ice; settled remnants were digested similarly two more times. After the last digestion, cells were combined and filtered through 70  $\mu$ m nylon mesh. After centrifuged at 472 g for 5 min, pellets

were resuspended in 10 ml RPMI-containing 10% FBS (RPMI-10), spun again, and resuspended in either cold FACS buffer (5 Mm EDTA, 2%FBS in PBS) or RPMI-10. Newborn and fetal thymi were treated similarly except that 500  $\mu$ l of digestion buffer was used. TECs used for sorting were enriched by EasySep APC positive selection Kit (Stemcell Technologies) after staining with an APC-conjugated anti-EpCAM antibody.

Total lung cells were isolated according to a published protocol with modifications [60]. Briefly, lung was cut into approximately 1–2 mm pieces and then digested in 2 ml digestion buffer (500  $\mu$ l 10 mg/ml collagenase type IV, 10  $\mu$ l 50 mg/ml DNase I and 1.5ml 5% FBS IMDM) at 37°C for 1 h with shaking every 10 min. Cells were washed with, and resuspended in, IMDM containing 5%FBS. Liver mononuclear cells were isolated using gradient centrifugation as previously described [61].

## Antibodies and Flow Cytometry

Fluorochrome-conjugated anti-CD45.2 (clone 104), CD45(clone 30-F11), CD45.1(clone A20), EpCAM/CD326 (clone G8.8), Ly51 (clone 6C3), MHCII-I-A/I-E (clone M5/114.15.2), CD40 (clone 3/23), CD4 (clone GK1.5), CD8 (clone 53–6.7), TCR- $\beta$  (clone H57-597), TCR $\gamma\delta$  (clone GL3, NK1.1 (clone PK136), CD44 (clone IM7), CD24 (clone M1/69), CD25 (clone PC61.5), CD27 (clone LG.3A10), c-Kit/CD117 (clone 2B8), CD62L (clone MEL-14), Gr1 (clone RB6-8C5), CD11b (clone M170), CD11c (clone N418), F4/80 (clone BM8), CD1d (clone 1B1), CD1d tetramer (NIH tetramer facility), B220 (clone RA3-6B2), CD19 (clone 6D5), TER119/Erythroid Cells (clone TER-119), CD3e (clone 145-2C11), Annexin-V, Streptavidin, CCR6 (clone 29-2L17), IFN- $\gamma$  (clone XMG1.2), IL-17A (clone TC11-18 H10.1), Foxp3 (clone FJK-61s, eBioscience), Anti-TCR-V $\gamma$ 1.1 (clone 2.11, BioXcell), V $\gamma$ 4 (clone UC3-10A6, BioXcell), V $\gamma$ 5 (clone 536), V $\gamma$ 7 (clone F2.67), and V $\delta$ 6.3 (clone 17C, kindly provided by Dr. Pablo Pereira, Institut Pasteur, France) were purchased from Biolegend unless indicated otherwise. Ulex Europaeus Agglutinin I (UEA-1, clone B-1065) was purchased from vector laboratories. Phospho-S6 (Ser235/236, d57.2.2E) antibody was from Cell Signal Technology. FITC-conjugated TCR-V $\beta$  usage kit, including anti-TCR $\beta$ 2 (clone B20.6),  $\beta$ 3 (clone KJ25),  $\beta$ 4 (clone KT4),  $\beta$ 5.1/5.2 (clone MR9-4),  $\beta$ 6 (clone RR4-7),  $\beta$ 7 (clone TR310),  $\beta$ 8.1/8.2 (clone MR5-2),  $\beta$ 8.3 (clone IB3.3),  $\beta$ 9 (clone MR10-2),  $\beta$ 10<sup>b</sup> (clone B21.5),  $\beta$ 11 (clone RR3-15),  $\beta$ 12 (clone MR11-1),  $\beta$ 13 (clone MR12-3),  $\beta$ 14 (clone 14–2), and  $\beta$ 17<sup>a</sup> (clone KJ23) were purchased from BD Pharmingen. The 17D1 (anti-V $\gamma$ 5V $\delta$ 1) monoclonal antibody was prepared from cultured hybridoma supernatant after ammonium sulfate precipitation and affinity purification with a goat anti-rat IgM (Jackson ImmunoResearch Laboratories) conjugated Sepharose-4B beads (Amersham Pharmacia Biotech AB) and was conjugated with biotin (ProteoChem) according to a manufacturer's protocol. The 17D1 antibody detects V $\gamma$ 6V $\delta$ 1 when pretreated with the anti-TCR $\gamma\delta$  (GL3) antibody [62]. Cells were stained for cell surface molecules using 2% FBS-PBS. Cell death was identified by using the Violet Live/Dead cell kit (Invitrogen) or annexin-V and 7-AAD. Intracellular staining for Foxp3 was performed using the eBioscience Foxp3 Staining Buffer Set. Phospho-S6 staining was performed using the BD Biosciences Cytofix/Cytoperm and Perm/Wash solutions. Stained samples were acquired on a FACS Canto-II (BD Biosciences) flow cytometer. Data was analyzed with FlowJo software (Tree Star). All FCS files associated with data presented in this study have been deposited in the zenodo website (<http://zenodo.org/record/34843> or DOI URL: <http://dx.doi.org/10.5281/zenodo.34843>).

## Stimulation and Intracellular Cytokine Detection

Thymocytes and single cell suspensions from other organs were stimulated with phorbol 12-myristate 13-acetate (PMA, 50 ng/ml) plus ionomycin (500 ng/ml) in the presence of

GolgiPlug (1 ng/ml) for 4 h. After cell surface staining, intracellular staining for IL-17A and IFN- $\gamma$  was performed by using the BD Biosciences Cytofix/Cytoperm and Perm/Wash solutions.

### BrdU Incorporation

For thymocytes, mice were i. p. injected with 5-bromo-2-deoxyuridine (BrdU, Sigma; 1 mg/mouse or 50 mg/kg in 100–200  $\mu$ l PBS) and were stained 4 h after injection to assess BrdU incorporation. For embryonic ETPs, mice pregnant for 16 d were i. p. injected with 3 mg BrdU, and fetal thymi were collected 6 h after injection to assess BrdU incorporation. For TECs, mice were i. p. injected with 1 mg BrdU 3 times every 24 h, and thymi were collected 14 h after the last injection for TEC preparation. After cell surface staining, cells were intracellularly stained for BrdU using a BrdU Flow Kit (BD Biosciences) according to the manufacturer's protocol.

### Histology and Immunofluorescence Microscopy

Thymus for H&E staining were fixed in 10% formalin solution for 1 d, and then changed into 70% ethanol. Paraffin-thin sections were stained with H&E according to standard protocols. Thymus for immunofluorescent staining were embedded in OCT (Leica Biosystems Richmond Inc, Richmond) and frozen immediately in  $-80^{\circ}\text{C}$ . Frozen thin sections (5  $\mu$ m) were fixed in a 1:1 mixture of acetone and methanol at  $-20^{\circ}\text{C}$  for 8 min. After blocking with PBS containing 3% BSA with 0.1% Tritonx-100 for 30–45 min at room temperature (RT), samples were stained using primary rat-anti-mouse-keratin 8 (Troma-1, DSHB, University of Iowa, 1:50 dilution) and rabbit-anti-mouse-keratin 5 (PRB-160P, Covance; 1:200 dilution), followed by secondary Rhodamine-conjugated-donkey anti-rabbit IgG (1:400 dilution) and FITC-conjugated-goat anti-rat IgG (1:400 dilution, Santa Cruz Biotechnology). Samples were mounted with Vector mounting solution containing DAPI (Vector) and allowed to dry overnight at RT or  $4^{\circ}\text{C}$  in the dark before imaging. Images were acquired using a Zeiss ApoTome Microscope and analyzed using PhotoshopCS4 software.

### Bone Marrow Reconstitution and Generation of Irradiation Chimeric Mice

CD45.1<sup>+</sup>CD45.2<sup>+</sup> WT bone marrow cells were depleted off T cells using a PE-conjugated anti-CD3 antibody, anti-PE-antibody conjugated magnetic beads, and LD columns (Miltenyi Biotec) according to the manufacturer's protocol. CD45.2<sup>+</sup> *Rpt<sup>fl/fl</sup>* and *Rpt<sup>fl/fl</sup>-Foxn1Cre* mice were lethally irradiated (1000 rad) and were intravenously injected with  $1.0 \times 10^7$  T cell depleted bone marrow cells 4 h after irradiation. Recipient mice were analyzed 5–6 wk later.

### TEC Glucose Uptake Assay

Single cell suspension made for TEC preparations from 3-wk-old *Rpt<sup>fl/fl</sup>-Foxn1Cre* and WT littermates were plated at  $1 \times 10^7$  cells/well in 96-well U-bottom plates and treated with or without fluorescent 100  $\mu$ M 2-(N-(7-Nitrobenz-2-oxa-1, 3-diazol-4-yl)Amino)-2-Deoxyglucose (2-NBDG; Life Technologies) in PBS and incubated at  $37^{\circ}\text{C}$  with 5%  $\text{CO}_2$  for 30 min. The 2-NBDG uptake reaction was stopped by removing culture medium and washed with pre-clod PBS two times. Cells were stained for surface molecules before analysis with flow cytometry.

### Quantitative Real-Time and Semiquantitative PCR

Total RNAs were extracted from E16 thymi or sorted 10 d-old mTECs (Epcam<sup>+</sup>CD45<sup>-</sup>UEA-1<sup>+</sup>Ly51<sup>-</sup>) and cTECs (Epcam<sup>+</sup>CD45<sup>-</sup>UEA-1<sup>+</sup>Ly51<sup>-</sup>) using the Trizol reagent (Sigma). The first strand cDNAs were reversely transcribed using an iScript cDNA Synthesis Kit (Bio-Rad).

**Table 1. Primer pairs.**

| Gene              | Forward Primer 5'-3'   | Reverse Primer 5'-3'            |
|-------------------|------------------------|---------------------------------|
| <i>CXCL12</i>     | GTCCTCTTGCTGTCCAGCTC   | GGTAGCTCAGGCTGACTGGT            |
| <i>CCL21</i>      | TCCGAGGCTATAGGAAGCAA   | CTTCTCAGGGTTTGCACAT             |
| <i>CCL25</i>      | TCACCAGCAGGAAGTGAGTG   | GATTCTCATCGCCCTTTCA             |
| <i>IL-7</i>       | ATTATGGGTGGTGAGAGCCG   | GTTCTGTCATTTTGTCCAATTCA         |
| <i>Foxn1</i>      | TGACGGAGCACTTCCCTTAC   | GACAGGTTATGGCGAACAGAA           |
| <i>Vα14-Jα2</i>   | ACACTGCCACCTACATCTGT   | GGTTGCAAATGGTGCCACTT-3          |
| <i>Vα14-Jα18</i>  | ACACTGCCACCTACATCTGT   | GTAGAAAAGAACTACTCACCA           |
| <i>Vα14-Jα56</i>  | ACACTGCCACCTACATCTGT   | TGTCATCAAAAACGTACCTGGT          |
| <i>TSC1</i>       | GTCACGACCGTAGGAGAAGC   | GAATCAACCCACAGAGCAT             |
| <i>TCRVγ1-Jγ4</i> | TTGGTACCGCAAAAAGCAAAAA | GGCACATCATGGGTCAAGAT            |
| <i>TCRVγ2-Jγ2</i> | CTGTTGATTTGTTTTTGGCCGG | TCTGCAAATACCTTGTGAAAGCCCGAGCTAT |
| <i>TCRVγ6-Cγ1</i> | GGACATGGCAGAGTGATTTG   | GGAAGGAAAATAGTGGGCTTG           |
| <i>TCRVγ5-Cγ1</i> | ACTCCCGCTTGAAATTGAT    | TGTCTGCATCAAGCCTTTTG            |
| <i>TCRVγ4-Cγ1</i> | TGCAACCCCTACCCATATTT   | TGTGGTGGATTCCAGATTCA            |
| <i>TCRVδ1-Cδ</i>  | ATTCAGAAGGCAACAATGAAAG | ATGATGAAAACAGATGGTTTGG          |
| <i>β-actin</i>    | TGTCCACCTTCCAGCAGATGT  | AGCTCAGTAACAGTCCGCCTAGA         |

doi:10.1371/journal.pbio.1002370.t001

Quantitative real-time PCR (qRT-PCR) was performed using a Mastercycler Realplex (Eppendorf) and the SensiMix SYBR No-ROX Kit (Bioline). Data were analyzed using the  $2^{-Ct}$  method after normalization to  $\beta$ -actin expression and shown as relative expression levels. For semi-quantitative PCR, cDNA template in 1:4 serial dilutions from each sample was used. For  $V\alpha 14$  to  $J\alpha 2$ ,  $J\alpha 18$ , and  $J\alpha 56$  recombination, genomic DNA isolated from sorted  $CD4^+CD8^+$  DP thymocytes from  $Rpt^{f/f}$  and  $Rpt^{f/f}$ - $Foxn1Cre$  mice was used as the template for semi-quantitative PCR according to a previously published protocol except that *TSC1* was used as loading control [61]. Primer pairs used for the amplification are summarized in Table 1.

### Statistical Analysis

Data were presented as mean  $\pm$  SEM and analyzed for statistical differences using the Prism 5/GraphPad software. Comparisons were made using two-tailed Student's *t* test. *p*-Values less than 0.05 were considered significant.

### Supporting Information

**S1 Data. Raw data for analyses shown in Figures and Supplemental Figures of the manuscript.**

(XLSX)

**S1 Fig. Gating strategies for FACS plots in Fig 1. A.** Gating strategies to get to TECs for Fig 1A. **B.** Gating strategies to get to live thymocytes for Fig 1D. **C.** Gating strategies to get to thymocytes for Fig 1E. **D.** Gating strategies to get to TECs for Fig 1I and 1K.

(PDF)

**S2 Fig. Gating strategies for FACS plots in Fig 3.** Gating strategies to get to TECs for Fig 3A, 3F and 3G.

(PDF)

**S3 Fig. Effects of Cre expression in TECs on thymopoiesis and T cell development.**

*Foxn1Cre*<sup>+</sup> and *Foxn1Cre*<sup>-</sup> 3-wk-old litter-mates were examined. **A.** Thymus size. **B.** Total



thymic cellularity. Each circle or square represents one *Foxn1Cre* and WT, respectively. Bars represent mean  $\pm$  SEM. **C.** Representative dot plots of thymocytes. **D.** Percentages and numbers of thymocyte subsets. **E.** Representative dot plots of TECs. **F.** Percentages and numbers EpCAM<sup>+</sup>CD45<sup>-</sup> TECs in thymus. **G.** Percentages and numbers of mTECs and cTECs. **H.** MHCII and CD40 staining of gated mTECs. Data shown represent three experiments (WT,  $n = 5$ ; KO,  $n = 5$ ).

(PDF)

**S4 Fig. Gating strategies for FACS plots in Fig 4A, 4C and 4F.**

(PDF)

**S5 Fig. Gating strategies for FACS plots in Fig 5. A.** Gating strategy for Fig 5A. **B.** Gating strategy for Fig 5H.

(PDF)

**S6 Fig. Assessment of TCRV $\beta$  usages.** Splenocytes from *Rpt<sup>fl/fl</sup>* and *Rpt<sup>fl/fl</sup>-Foxn1Cre* mice were stained with CD4, CD8, and individual TCRV $\beta$  chains using a TCR $\beta$  staining kit (BD Biosciences). Bar graphs represent mean  $\pm$  SEM of individual TCR $\beta$  chain percentages in gated CD4 or CD8 T cells.

(PDF)

**S7 Fig. Gating strategies for FACS plots in Fig 6. A.** Gating strategy for Fig 6A and 6D. **B.** Gating strategy for Fig 6H. **C.** Gating strategy for Fig 6I and 6M.

(PDF)

**S8 Fig. Gating strategies for FACS plots in Fig 7. A.** Gating strategy for Fig 7A. **B.** Gating strategy for Fig 7E.

(PDF)

**S9 Fig. Gating strategies for FACS plots in Fig 8. A.** Gating strategy for Fig 8A. **B.** Gating strategy for Fig 8E.

(PDF)

**S10 Fig. Effects of Cre expression in TECs on  $\gamma\delta$ T cell development.** *Foxn1Cre<sup>+</sup>* and *Foxn1Cre<sup>-</sup>* 3-wk-old litter-mates were examined. **A.**  $\gamma\delta$ T percentages and numbers in the thymus. **B.** Representative dot plots of IL-17A and IFN $\gamma$  staining in thymic  $\gamma\delta$ T cells. Thymocytes were stimulated with PMA plus ionomycin in the presence of brefeldin A (BFA) for 4 h followed by cell surface and intracellular staining. Dot plots show IL-17A and IFN $\gamma$  expression in gated TCR $\gamma\delta^+$ TCR $\beta^-$  cells. **C.**  $\gamma\delta$ T1 and  $\gamma\delta$ T17 percentages and numbers in the thymus. **D.**  $\gamma\delta$ T1 and  $\gamma\delta$ T17 numbers in the thymus. Data shown represent three experiments (WT,  $n = 5$ ; KO,  $n = 5$ ).

(PDF)

**S11 Fig. Gating strategies for FACS plots in Fig 9. A.** Sorting strategy for  $\gamma\delta$ T cells used in Fig 9A and 9B. **B.** Gating strategy for Fig 9D. **C.** Gating strategy for Fig 9F.

(PDF)

**S12 Fig. Representative dot plots showing TCR $\gamma\delta$  and indicated V $\gamma$  staining in gated TCR $\gamma\delta^+$ TCR $\beta^-$  thymocytes from newborn *Rpt<sup>fl/fl</sup>* and *Rpt<sup>fl/fl</sup>-Foxn1Cre* mice.** Data shown represent three experiments.

(PDF)

**S13 Fig. Gating strategies for FACS plots in Fig 10. A.** Gating strategy for Fig 10A. **B.** Gating strategy for Fig 10E. **C.** Gating strategy for Fig 10I. **D.** Gating strategy for Fig 10M.

(PDF)

**S14 Fig. Gating strategies for FACS plots in Fig 11.** A. Gating strategy for Fig 11A. B. Gating strategy for Fig 11G.

(PDF)

**S15 Fig. Foxn1 expression in TECs.** Relative Foxn1 mRNA levels in sorted TECs from 10-d-old mice were determined by real-time qPCR.

(PDF)

**S16 Fig.  $iV\alpha 14$ - $J\alpha 18$  recombination and CD1d expression in DP thymocytes.** A. Genomic DNA isolated from sorted CD4<sup>+</sup>CD8<sup>+</sup> DP thymocytes from *Rpt<sup>fl/fl</sup>* and *Rpt<sup>fl/fl</sup>-Foxn1Cre* mice were utilized for detection of  $V\alpha 14$  to  $J\alpha 2$ ,  $J\alpha 18$ , and  $J\alpha 56$  recombination using semi-quantitative PCR. *TSC1* was used as loading control. B. Overlaid histograms show CD1d expression on DP thymocytes. Data shown represent three experiments.

(PDF)

## Acknowledgments

We thank Dr. Nancy Manley for kindly providing the *Foxn1Cre* mice, Dr. Gregory Sempowski for helpful discussions, Drs. Robert Tigelaar, Wendy Havran, and Willie Born for providing the 17D1 hybridoma, the NIH Tetramer Facility for providing CD1d Tetramers, the Flow Cytometry Facility in Duke Cancer Institute for sorting service, and Shelley Chen for editing the manuscript.

## Author Contributions

Conceived and designed the experiments: HXW XPZ. Performed the experiments: HXW JS SW BG XL. Analyzed the data: HXW JS SW BG XL JG YRQ. Wrote the paper: HXW JS XPZ.

## References

1. Anderson G, Takahama Y. Thymic epithelial cells: working class heroes for T cell development and repertoire selection. *Trends Immunol.* 2012; 33(6):256–63. doi: [10.1016/j.it.2012.03.005](https://doi.org/10.1016/j.it.2012.03.005) PMID: [22591984](https://pubmed.ncbi.nlm.nih.gov/22591984/).
2. Klein L, Kyewski B, Allen PM, Hogquist KA. Positive and negative selection of the T cell repertoire: what thymocytes see (and don't see). *Nat Rev Immunol.* 2014; 14(6):377–91. Epub 2014/05/17. doi: [10.1038/nri3667](https://doi.org/10.1038/nri3667) PMID: [24830344](https://pubmed.ncbi.nlm.nih.gov/24830344/).
3. Cowan JE, Parnell SM, Nakamura K, Caamano JH, Lane PJ, Jenkinson EJ, et al. The thymic medulla is required for Foxp3<sup>+</sup> regulatory but not conventional CD4<sup>+</sup> thymocyte development. *J Exp Med.* 2013; 210(4):675–81. doi: [10.1084/jem.20122070](https://doi.org/10.1084/jem.20122070) PMID: [23530124](https://pubmed.ncbi.nlm.nih.gov/23530124/); PubMed Central PMCID: PMC3620359.
4. Perry JS, Lio CW, Kau AL, Nutsch K, Yang Z, Gordon JL, et al. Distinct contributions of Aire and antigen-presenting-cell subsets to the generation of self-tolerance in the thymus. *Immunity.* 2014; 41(3):414–26. Epub 2014/09/16. doi: [10.1016/j.immuni.2014.08.007](https://doi.org/10.1016/j.immuni.2014.08.007) PMID: [25220213](https://pubmed.ncbi.nlm.nih.gov/25220213/); PubMed Central PMCID: PMC4175925.
5. Coquet JM, Ribot JC, Babala N, Middendorp S, van der Horst G, Xiao Y, et al. Epithelial and dendritic cells in the thymic medulla promote CD4<sup>+</sup>Foxp3<sup>+</sup> regulatory T cell development via the CD27-CD70 pathway. *J Exp Med.* 2013; 210(4):715–28. doi: [10.1084/jem.20112061](https://doi.org/10.1084/jem.20112061) PMID: [23547099](https://pubmed.ncbi.nlm.nih.gov/23547099/); PubMed Central PMCID: PMC3620350.
6. Gray DH, Seach N, Ueno T, Milton MK, Liston A, Lew AM, et al. Developmental kinetics, turnover, and stimulatory capacity of thymic epithelial cells. *Blood.* 2006; 108(12):3777–85. Epub 2006/08/10. doi: [10.1182/blood-2006-02-004531](https://doi.org/10.1182/blood-2006-02-004531) PMID: [16896157](https://pubmed.ncbi.nlm.nih.gov/16896157/).
7. Nehls M, Kyewski B, Messerle M, Waldschutz R, Schuddekopf K, Smith AJ, et al. Two genetically separable steps in the differentiation of thymic epithelium. *Science.* 1996; 272(5263):886–9. PMID: [8629026](https://pubmed.ncbi.nlm.nih.gov/8629026/).
8. Akiyama T, Shimo Y, Yanai H, Qin J, Ohshima D, Maruyama Y, et al. The tumor necrosis factor family receptors RANK and CD40 cooperatively establish the thymic medullary microenvironment and self-tolerance. *Immunity.* 2008; 29(3):423–37. doi: [10.1016/j.immuni.2008.06.015](https://doi.org/10.1016/j.immuni.2008.06.015) PMID: [18799149](https://pubmed.ncbi.nlm.nih.gov/18799149/).

9. Boehm T, Scheu S, Pfeffer K, Bleul CC. Thymic medullary epithelial cell differentiation, thymocyte emigration, and the control of autoimmunity require lympho-epithelial cross talk via LTbetaR. *J Exp Med*. 2003; 198(5):757–69. doi: [10.1084/jem.20030794](https://doi.org/10.1084/jem.20030794) PMID: [12953095](https://pubmed.ncbi.nlm.nih.gov/12953095/); PubMed Central PMCID: PMC2194183.
10. Yang Q, Jeremiah Bell J, Bhandoola A. T-cell lineage determination. *Immunol Rev*. 2010; 238(1):12–22. Epub 2010/10/26. doi: [10.1111/j.1600-065X.2010.00956.x](https://doi.org/10.1111/j.1600-065X.2010.00956.x) PMID: [20969581](https://pubmed.ncbi.nlm.nih.gov/20969581/); PubMed Central PMCID: PMC2972740.
11. Fahl SP, Coffey F, Wiest DL. Origins of gammadelta T cell effector subsets: a riddle wrapped in an enigma. *J Immunol*. 2014; 193(9):4289–94. Epub 2014/10/19. doi: [10.4049/jimmunol.1401813](https://doi.org/10.4049/jimmunol.1401813) PMID: [25326547](https://pubmed.ncbi.nlm.nih.gov/25326547/).
12. Haas JD, Ravens S, Duber S, Sandrock I, Oberdorfer L, Kashani E, et al. Development of interleukin-17-producing gammadelta T cells is restricted to a functional embryonic wave. *Immunity*. 2012; 37(1):48–59. doi: [10.1016/j.immuni.2012.06.003](https://doi.org/10.1016/j.immuni.2012.06.003) PMID: [22770884](https://pubmed.ncbi.nlm.nih.gov/22770884/).
13. Ribot JC, deBarros A, Pang DJ, Neves JF, Peperzak V, Roberts SJ, et al. CD27 is a thymic determinant of the balance between interferon-gamma- and interleukin 17-producing gammadelta T cell subsets. *Nat Immunol*. 2009; 10(4):427–36. Epub 2009/03/10. doi: [10.1038/ni.1717](https://doi.org/10.1038/ni.1717) PMID: [19270712](https://pubmed.ncbi.nlm.nih.gov/19270712/); PubMed Central PMCID: PMC4167721.
14. Havran WL, Allison JP. Developmentally ordered appearance of thymocytes expressing different T-cell antigen receptors. *Nature*. 1988; 335(6189):443–5. doi: [10.1038/335443a0](https://doi.org/10.1038/335443a0) PMID: [2458531](https://pubmed.ncbi.nlm.nih.gov/2458531/).
15. Haas W, Pereira P, Tonegawa S. Gamma/delta cells. *Ann Rev Immunol*. 1993; 11:637–85. doi: [10.1146/annurev.iv.11.040193.003225](https://doi.org/10.1146/annurev.iv.11.040193.003225) PMID: [8476575](https://pubmed.ncbi.nlm.nih.gov/8476575/).
16. Singer A, Bosselut R. CD4/CD8 coreceptors in thymocyte development, selection, and lineage commitment: analysis of the CD4/CD8 lineage decision. *Adv Immunol*. 2004; 83:91–131. Epub 2004/05/12. doi: [10.1016/S0065-2776\(04\)83003-7](https://doi.org/10.1016/S0065-2776(04)83003-7) PMID: [15135629](https://pubmed.ncbi.nlm.nih.gov/15135629/).
17. Kwan J, Killeen N. CCR7 directs the migration of thymocytes into the thymic medulla. *J Immunol*. 2004; 172(7):3999–4007. PMID: [15034011](https://pubmed.ncbi.nlm.nih.gov/15034011/).
18. Derbinski J, Schulte A, Kyewski B, Klein L. Promiscuous gene expression in medullary thymic epithelial cells mirrors the peripheral self. *Nat Immunol*. 2001; 2(11):1032–9. Epub 2001/10/16. doi: [10.1038/ni723](https://doi.org/10.1038/ni723) PMID: [11600886](https://pubmed.ncbi.nlm.nih.gov/11600886/).
19. Su DM, Navarre S, Oh WJ, Condie BG, Manley NR. A domain of Foxn1 required for crosstalk-dependent thymic epithelial cell differentiation. *Nat Immunol*. 2003; 4(11):1128–35. doi: [10.1038/ni983](https://doi.org/10.1038/ni983) PMID: [14528302](https://pubmed.ncbi.nlm.nih.gov/14528302/).
20. Anderson MS, Venanzi ES, Klein L, Chen Z, Berzins SP, Turley SJ, et al. Projection of an immunological self shadow within the thymus by the aire protein. *Science*. 2002; 298(5597):1395–401. Epub 2002/10/12. doi: [10.1126/science.1075958](https://doi.org/10.1126/science.1075958) PMID: [12376594](https://pubmed.ncbi.nlm.nih.gov/12376594/).
21. Laplante M, Sabatini DM. mTOR signaling in growth control and disease. *Cell*. 2012; 149(2):274–93. doi: [10.1016/j.cell.2012.03.017](https://doi.org/10.1016/j.cell.2012.03.017) PMID: [22500797](https://pubmed.ncbi.nlm.nih.gov/22500797/); PubMed Central PMCID: PMC3331679.
22. Gorentla BK, Wan CK, Zhong XP. Negative regulation of mTOR activation by diacylglycerol kinases. *Blood*. 2011; 117(15):4022–31. doi: [10.1182/blood-2010-08-300731](https://doi.org/10.1182/blood-2010-08-300731) PMID: [21310925](https://pubmed.ncbi.nlm.nih.gov/21310925/); PubMed Central PMCID: PMC3087529.
23. Wu J, Yang J, Yang K, Wang H, Gorentla B, Shin J, et al. iNKT cells require TSC1 for terminal maturation and effector lineage fate decisions. *J Clin Invest*. 2014; 124(4):1685–98. Epub 2014/03/13. doi: [10.1172/JCI69780](https://doi.org/10.1172/JCI69780) PMID: [24614103](https://pubmed.ncbi.nlm.nih.gov/24614103/); PubMed Central PMCID: PMC3973110.
24. Shin J, Wang S, Deng W, Wu J, Gao J, Zhong XP. Mechanistic target of rapamycin complex 1 is critical for invariant natural killer T-cell development and effector function. *Proc Natl Acad Sci USA*. 2014; 111(8):E776–83. Epub 2014/02/12. doi: [10.1073/pnas.1315435111](https://doi.org/10.1073/pnas.1315435111) PMID: [24516149](https://pubmed.ncbi.nlm.nih.gov/24516149/); PubMed Central PMCID: PMC3939904.
25. Zeng H, Yang K, Cloer C, Neale G, Vogel P, Chi H. mTORC1 couples immune signals and metabolic programming to establish T(reg)-cell function. *Nature*. 2013; 499(7459):485–90. doi: [10.1038/nature12297](https://doi.org/10.1038/nature12297) PMID: [23812589](https://pubmed.ncbi.nlm.nih.gov/23812589/); PubMed Central PMCID: PMC3759242.
26. Xie DL, Wu J, Lou YL, Zhong XP. Tumor suppressor TSC1 is critical for T-cell anergy. *Proc Natl Acad Sci USA*. 2012; 109(35):14152–7. doi: [10.1073/pnas.1119744109](https://doi.org/10.1073/pnas.1119744109) PMID: [22891340](https://pubmed.ncbi.nlm.nih.gov/22891340/); PubMed Central PMCID: PMC3435231.
27. Lee K, Nam KT, Cho SH, Gudapati P, Hwang Y, Park DS, et al. Vital roles of mTOR complex 2 in Notch-driven thymocyte differentiation and leukemia. *J Exp Med*. 2012; 209(4):713–28. Epub 2012/04/05. doi: [10.1084/jem.20111470](https://doi.org/10.1084/jem.20111470) PMID: [22473959](https://pubmed.ncbi.nlm.nih.gov/22473959/); PubMed Central PMCID: PMC3328370.
28. Hoshii T, Kasada A, Hatakeyama T, Ohtani M, Tadokoro Y, Naka K, et al. Loss of mTOR complex 1 induces developmental blockage in early T-lymphopoiesis and eradicates T-cell acute lymphoblastic

- leukemia cells. *Proc Natl Acad Sci USA*. 2014; 111(10):3805–10. Epub 2014/02/26. doi: [10.1073/pnas.1320265111](https://doi.org/10.1073/pnas.1320265111) PMID: [24567410](https://pubmed.ncbi.nlm.nih.gov/24567410/); PubMed Central PMCID: [PMC3956177](https://pubmed.ncbi.nlm.nih.gov/PMC3956177/).
29. Gordon J, Xiao S, Hughes B, Su D-m, Navarre SP, Condie BG, et al. Specific expression of lacZ and cre recombinase in fetal thymic epithelial cells by multiplex gene targeting at the Foxn1 locus. *BMC Dev Biol*. 2007; 7(17577402):69.
  30. Shakib S, Desanti GE, Jenkinson WE, Parnell SM, Jenkinson EJ, Anderson G. Checkpoints in the development of thymic cortical epithelial cells. *J Immunol*. 2009; 182(1):130–7. PMID: [19109143](https://pubmed.ncbi.nlm.nih.gov/19109143/).
  31. Nowell CS, Bredenkamp N, Tetelin S, Jin X, Tischner C, Vaidya H, et al. Foxn1 regulates lineage progression in cortical and medullary thymic epithelial cells but is dispensable for medullary sublineage divergence. *PLoS Genet*. 2011; 7(11):e1002348. doi: [10.1371/journal.pgen.1002348](https://doi.org/10.1371/journal.pgen.1002348) PMID: [22072979](https://pubmed.ncbi.nlm.nih.gov/22072979/); PubMed Central PMCID: [PMC3207875](https://pubmed.ncbi.nlm.nih.gov/PMC3207875/).
  32. Egawa T, Eberl G, Taniuchi I, Benlagha K, Geissmann F, Hennighausen L, et al. Genetic evidence supporting selection of the Valpha14i NKT cell lineage from double-positive thymocyte precursors. *Immunity*. 2005; 22(6):705–16. Epub 2005/06/21. doi: [10.1016/j.immuni.2005.03.011](https://doi.org/10.1016/j.immuni.2005.03.011) PMID: [15963785](https://pubmed.ncbi.nlm.nih.gov/15963785/).
  33. White AJ, Jenkinson WE, Cowan JE, Parnell SM, Bacon A, Jones ND, et al. An essential role for medullary thymic epithelial cells during the intrathymic development of invariant NKT cells. *J Immunol*. 2014; 192(6):2659–66. doi: [10.4049/jimmunol.1303057](https://doi.org/10.4049/jimmunol.1303057) PMID: [24510964](https://pubmed.ncbi.nlm.nih.gov/24510964/); PubMed Central PMCID: [PMC3948113](https://pubmed.ncbi.nlm.nih.gov/PMC3948113/).
  34. Chien YH, Meyer C, Bonneville M. gammadelta T cells: first line of defense and beyond. *Ann Rev Immunol*. 2014; 32:121–55. doi: [10.1146/annurev-immunol-032713-120216](https://doi.org/10.1146/annurev-immunol-032713-120216) PMID: [24387714](https://pubmed.ncbi.nlm.nih.gov/24387714/).
  35. Born WK, Kemal Aydintug M, O'Brien RL. Diversity of gammadelta T-cell antigens. *Cell Mol Immunol*. 2013; 10(1):13–20. Epub 2012/10/23. doi: [10.1038/cmi.2012.45](https://doi.org/10.1038/cmi.2012.45) PMID: [23085946](https://pubmed.ncbi.nlm.nih.gov/23085946/); PubMed Central PMCID: [PMC4003174](https://pubmed.ncbi.nlm.nih.gov/PMC4003174/).
  36. Turchinovich G, Hayday AC. Skint-1 identifies a common molecular mechanism for the development of interferon-gamma-secreting versus interleukin-17-secreting gammadelta T cells. *Immunity*. 2011; 35(1):59–68. Epub 2011/07/09. doi: [10.1016/j.immuni.2011.04.018](https://doi.org/10.1016/j.immuni.2011.04.018) PMID: [21737317](https://pubmed.ncbi.nlm.nih.gov/21737317/).
  37. Liu C, Ueno T, Kuse S, Saito F, Nitta T, Piali L, et al. The role of CCL21 in recruitment of T-precursor cells to fetal thymi. *Blood*. 2005; 105(1):31–9. Epub 2004/09/11. doi: [10.1182/blood-2004-04-1369](https://doi.org/10.1182/blood-2004-04-1369) PMID: [15358618](https://pubmed.ncbi.nlm.nih.gov/15358618/).
  38. Zlotoff DA, Sambandam A, Logan TD, Bell JJ, Schwarz BA, Bhandoola A. CCR7 and CCR9 together recruit hematopoietic progenitors to the adult thymus. *Blood*. 2010; 115(10):1897–905. Epub 2009/12/08. doi: [10.1182/blood-2009-08-237784](https://doi.org/10.1182/blood-2009-08-237784) PMID: [19965655](https://pubmed.ncbi.nlm.nih.gov/19965655/); PubMed Central PMCID: [PMC2837318](https://pubmed.ncbi.nlm.nih.gov/PMC2837318/).
  39. Krueger A, Willenzon S, Lyszkiewicz M, Kremmer E, Forster R. CC chemokine receptor 7 and 9 double-deficient hematopoietic progenitors are severely impaired in seeding the adult thymus. *Blood*. 2010; 115(10):1906–12. Epub 2009/12/31. doi: [10.1182/blood-2009-07-235721](https://doi.org/10.1182/blood-2009-07-235721) PMID: [20040757](https://pubmed.ncbi.nlm.nih.gov/20040757/).
  40. Calderon L, Boehm T. Three chemokine receptors cooperatively regulate homing of hematopoietic progenitors to the embryonic mouse thymus. *Proc Natl Acad Sci USA*. 2011; 108(18):7517–22. Epub 2011/04/20. doi: [10.1073/pnas.1016428108](https://doi.org/10.1073/pnas.1016428108) PMID: [21502490](https://pubmed.ncbi.nlm.nih.gov/21502490/); PubMed Central PMCID: [PMC3088600](https://pubmed.ncbi.nlm.nih.gov/PMC3088600/).
  41. Luo H, Duguid W, Chen H, Maheu M, Wu J. The effect of rapamycin on T cell development in mice. *Eur J Immunol*. 1994; 24(3):692–701. doi: [10.1002/eji.1830240331](https://doi.org/10.1002/eji.1830240331) PMID: [8125138](https://pubmed.ncbi.nlm.nih.gov/8125138/).
  42. Hoshii T, Tadokoro Y, Naka K, Ooshio T, Muraguchi T, Sugiyama N, et al. mTORC1 is essential for leukemia propagation but not stem cell self-renewal. *J Clin Invest*. 2012; 122(6):2114–29. Epub 2012/05/25. doi: [10.1172/JCI62279](https://doi.org/10.1172/JCI62279) PMID: [22622041](https://pubmed.ncbi.nlm.nih.gov/22622041/); PubMed Central PMCID: [PMC3366413](https://pubmed.ncbi.nlm.nih.gov/PMC3366413/).
  43. Chen L, Xiao S, Manley NR. Foxn1 is required to maintain the postnatal thymic microenvironment in a dosage-sensitive manner. *Blood*. 2009; 113(3):567–74. doi: [10.1182/blood-2008-05-156265](https://doi.org/10.1182/blood-2008-05-156265) PMID: [18978204](https://pubmed.ncbi.nlm.nih.gov/18978204/); PubMed Central PMCID: [PMC2628364](https://pubmed.ncbi.nlm.nih.gov/PMC2628364/).
  44. Cheng L, Guo J, Sun L, Fu J, Barnes PF, Metzger D, et al. Postnatal tissue-specific disruption of transcription factor FoxN1 triggers acute thymic atrophy. *J Biol Chem*. 2010; 285(8):5836–47. doi: [10.1074/jbc.M109.072124](https://doi.org/10.1074/jbc.M109.072124) PMID: [19955175](https://pubmed.ncbi.nlm.nih.gov/19955175/); PubMed Central PMCID: [PMC2820809](https://pubmed.ncbi.nlm.nih.gov/PMC2820809/).
  45. Manley NR, Condie BG. Transcriptional regulation of thymus organogenesis and thymic epithelial cell differentiation. *Prog Mol Biol Transl Sci*. 2010; 92:103–20. doi: [10.1016/S1877-1173\(10\)92005-X](https://doi.org/10.1016/S1877-1173(10)92005-X) PMID: [20800818](https://pubmed.ncbi.nlm.nih.gov/20800818/).
  46. Hauri-Hohl M, Zuklys S, Hollander GA, Ziegler SF. A regulatory role for TGF-beta signaling in the establishment and function of the thymic medulla. *Nat Immunol*. 2014; 15(6):554–61. doi: [10.1038/ni.2869](https://doi.org/10.1038/ni.2869) PMID: [24728352](https://pubmed.ncbi.nlm.nih.gov/24728352/).
  47. Mahmud SA, Manlove LS, Schmitz HM, Xing Y, Wang Y, Owen DL, et al. Costimulation via the tumor-necrosis factor receptor superfamily couples TCR signal strength to the thymic differentiation of

- regulatory T cells. *Nat Immunol.* 2014; 15(5):473–81. Epub 2014/03/19. doi: [10.1038/ni.2849](https://doi.org/10.1038/ni.2849) PMID: [24633226](https://pubmed.ncbi.nlm.nih.gov/24633226/); PubMed Central PMCID: PMC4000541.
48. Weissman IL. Developmental switches in the immune system. *Cell.* 1994; 76(2):207–18. PMID: [8293459](https://pubmed.ncbi.nlm.nih.gov/8293459/).
  49. Nitta T, Muro R, Shimizu Y, Nitta S, Oda H, Ohte Y, et al. The thymic cortical epithelium determines the TCR repertoire of IL-17-producing gammadelta T cells. *EMBO reports.* 2015; 16(5):638–53. doi: [10.15252/embr.201540096](https://doi.org/10.15252/embr.201540096) PMID: [25770130](https://pubmed.ncbi.nlm.nih.gov/25770130/); PubMed Central PMCID: PMC4428049.
  50. Ikuta K, Kina T, MacNeil I, Uchida N, Peault B, Chien YH, et al. A developmental switch in thymic lymphocyte maturation potential occurs at the level of hematopoietic stem cells. *Cell.* 1990; 62(5):863–74. PMID: [1975515](https://pubmed.ncbi.nlm.nih.gov/1975515/).
  51. Shibata K, Yamada H, Sato T, Dejima T, Nakamura M, Ikawa T, et al. Notch-Hes1 pathway is required for the development of IL-17-producing gammadelta T cells. *Blood.* 2011; 118(3):586–93. Epub 2011/05/25. doi: [10.1182/blood-2011-02-334995](https://doi.org/10.1182/blood-2011-02-334995) PMID: [21606479](https://pubmed.ncbi.nlm.nih.gov/21606479/).
  52. Do JS, Fink PJ, Li L, Spolski R, Robinson J, Leonard WJ, et al. Cutting edge: spontaneous development of IL-17-producing gamma delta T cells in the thymus occurs via a TGF-beta 1-dependent mechanism. *J Immunol.* 2010; 184(4):1675–9. Epub 2010/01/12. doi: [10.4049/jimmunol.0903539](https://doi.org/10.4049/jimmunol.0903539) PMID: [20061408](https://pubmed.ncbi.nlm.nih.gov/20061408/); PubMed Central PMCID: PMC2844788.
  53. Colpitts SL, Puddington L, Lefrancois L. IL-15 receptor alpha signaling constrains the development of IL-17-producing gammadelta T cells. *Proc Natl Acad Sci USA.* 2015; 112(31):9692–7. doi: [10.1073/pnas.1420741112](https://doi.org/10.1073/pnas.1420741112) PMID: [26195801](https://pubmed.ncbi.nlm.nih.gov/26195801/); PubMed Central PMCID: PMC4534247.
  54. Boehm T, Swann JB. Thymus involution and regeneration: two sides of the same coin? *Nat Rev Immunol.* 2013; 13(11):831–8. Epub 2013/09/21. doi: [10.1038/nri3534](https://doi.org/10.1038/nri3534) PMID: [24052146](https://pubmed.ncbi.nlm.nih.gov/24052146/).
  55. Holland AM, van den Brink MR. Rejuvenation of the aging T cell compartment. *Curr Opin Immunol.* 2009; 21(4):454–9. doi: [10.1016/j.coi.2009.06.002](https://doi.org/10.1016/j.coi.2009.06.002) PMID: [19608394](https://pubmed.ncbi.nlm.nih.gov/19608394/); PubMed Central PMCID: PMC2731988.
  56. Rossi SW, Jeker LT, Ueno T, Kuse S, Keller MP, Zuklys S, et al. Keratinocyte growth factor (KGF) enhances postnatal T-cell development via enhancements in proliferation and function of thymic epithelial cells. *Blood.* 2007; 109(9):3803–11. doi: [10.1182/blood-2006-10-049767](https://doi.org/10.1182/blood-2006-10-049767) PMID: [17213286](https://pubmed.ncbi.nlm.nih.gov/17213286/); PubMed Central PMCID: PMC1874572.
  57. Sengupta S, Peterson TR, Laplante M, Oh S, Sabatini DM. mTORC1 controls fasting-induced ketogenesis and its modulation by ageing. *Nature.* 2010; 468(7327):1100–4. doi: [10.1038/nature09584](https://doi.org/10.1038/nature09584) PMID: [21179166](https://pubmed.ncbi.nlm.nih.gov/21179166/).
  58. Shapiro-Shelef M, Lin KI, Savitsky D, Liao J, Calame K. Blimp-1 is required for maintenance of long-lived plasma cells in the bone marrow. *J Exp Med.* 2005; 202(11):1471–6. doi: [10.1084/jem.20051611](https://doi.org/10.1084/jem.20051611) PMID: [16314438](https://pubmed.ncbi.nlm.nih.gov/16314438/); PubMed Central PMCID: PMC2213334.
  59. Gray DH, Fletcher AL, Hammett M, Seach N, Ueno T, Young LF, et al. Unbiased analysis, enrichment and purification of thymic stromal cells. *J Immunol Methods.* 2008; 329(1–2):56–66. Epub 2007/11/09. doi: [10.1016/j.jim.2007.09.010](https://doi.org/10.1016/j.jim.2007.09.010) PMID: [17988680](https://pubmed.ncbi.nlm.nih.gov/17988680/).
  60. Sauer KA, Scholtes P, Karwot R, Finotto S. Isolation of CD4+ T cells from murine lungs: a method to analyze ongoing immune responses in the lung. *Nat Protocols.* 2006; 1(6):2870–5. Epub 2007/04/05. doi: [10.1038/nprot.2006.435](https://doi.org/10.1038/nprot.2006.435) PMID: [17406546](https://pubmed.ncbi.nlm.nih.gov/17406546/).
  61. Shen S, Chen Y, Gorenlla BK, Lu J, Stone JC, Zhong XP. Critical roles of RasGRP1 for invariant NKT cell development. *J Immunol.* 2011; 187(9):4467–73. doi: [10.4049/jimmunol.1003798](https://doi.org/10.4049/jimmunol.1003798) PMID: [21957144](https://pubmed.ncbi.nlm.nih.gov/21957144/); PubMed Central PMCID: PMC3212869.
  62. Roark CL, Aydintug MK, Lewis J, Yin X, Lahn M, Hahn YS, et al. Subset-specific, uniform activation among V $\gamma$ 6/V $\delta$ 1+  $\gamma\delta$  T cells elicited by inflammation. *J Leukocyte Biol.* 2004; 75(1):68–75. Epub 2003/10/04. doi: [10.1189/jlb.0703326](https://doi.org/10.1189/jlb.0703326) PMID: [14525969](https://pubmed.ncbi.nlm.nih.gov/14525969/).
