# Supplementary material for: mTORC1 in Thymic Epithelial Cells Is Critical for Thymopoiesis, T-Cell Generation, and Temporal Control of γδT17 Development and TCRγ/δ Recombination
Source: PLOS journal article supplement (doi:10.1371/journal.pbio.1002370), 2016-02-18

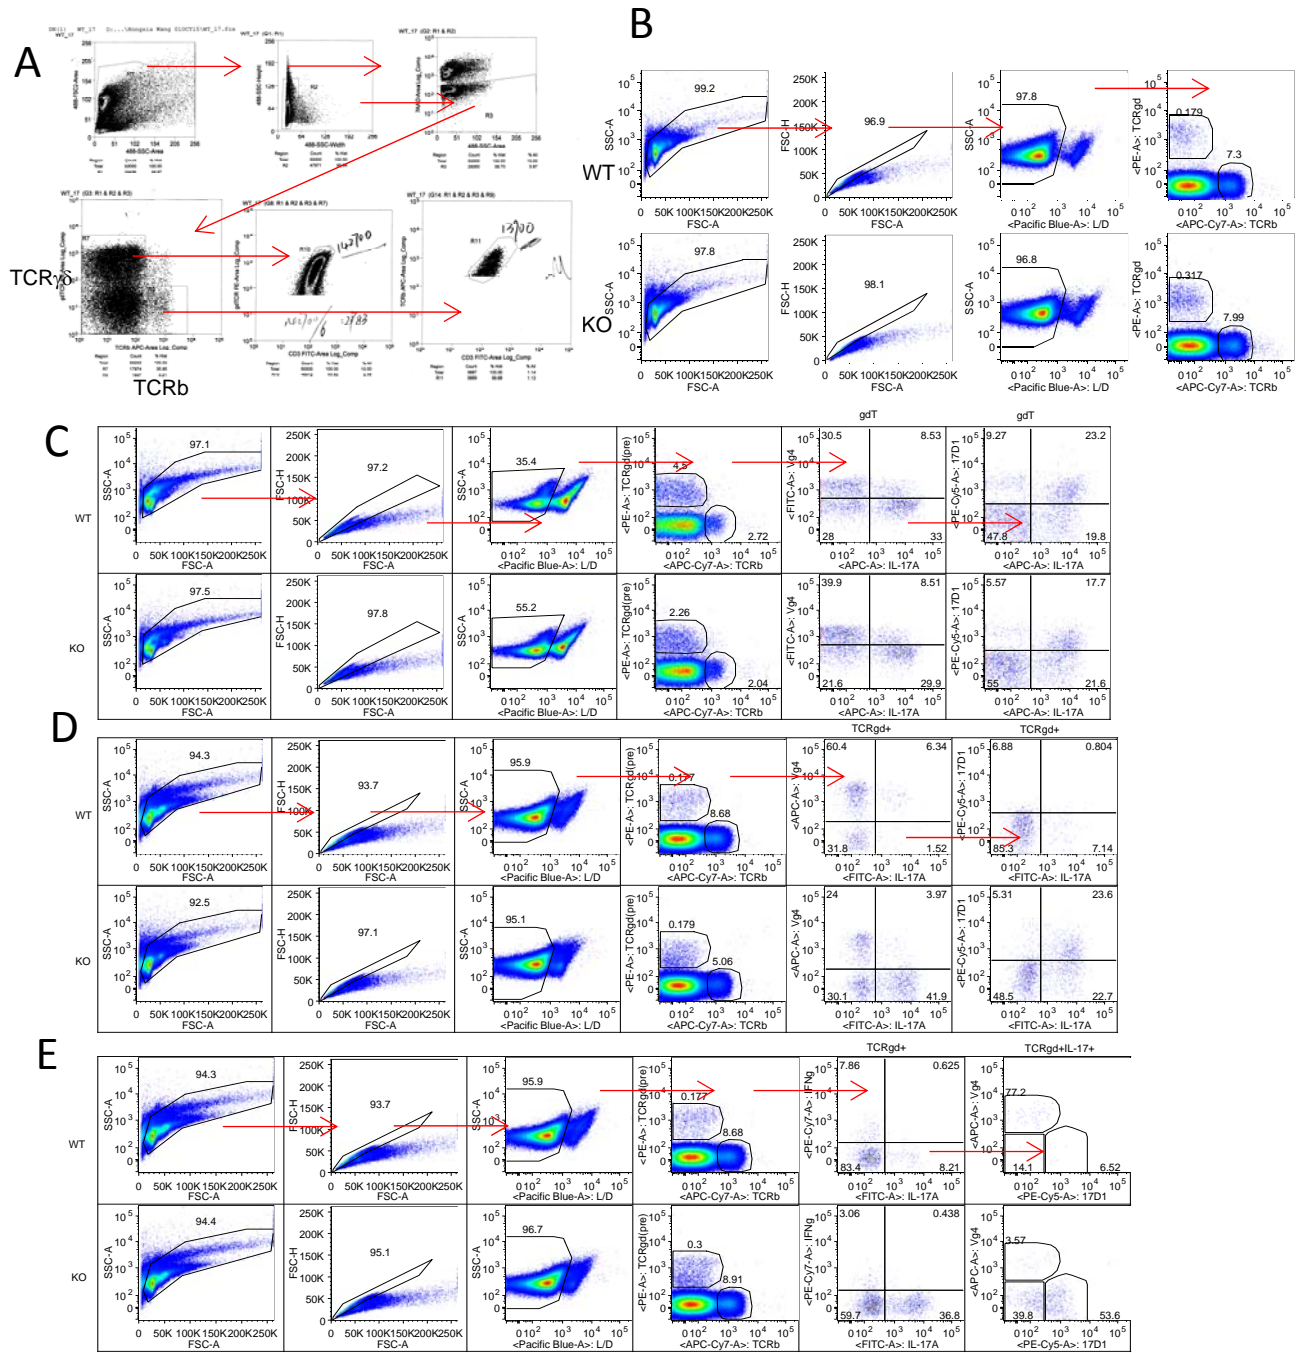

Supplement: S12 (10.1371/journal.pbio.1002370.s012) [file journal.pbio.1002370.s012]
